# Behavioral strategy shapes activation of the Vip-Sst disinhibitory circuit in visual cortex

Alex Piet, Nick Ponvert, Douglas Ollerenshaw, Marina Garrett, Peter A. Groblewski, Shawn Olsen, Christof Koch, Anton Arkhipov

Allen Institute, Mindscope Program, Seattle, Washington, United States.

correspondence should be addressed to: alex.piet@alleninstitute.org

## Abstract

In complex environments, animals can adopt diverse strategies to find rewards. How distinct strategies differentially engage brain circuits is not well understood. Here we investigate this question, focusing on the cortical Vip-Sst disinhibitory circuit. We characterize the behavioral strategies used by mice during a visual change detection task. Using a dynamic logistic regression model we find individual mice use mixtures of a visual comparison strategy and a statistical timing strategy. Separately, mice also have periods of task engagement and disengagement. Two-photon calcium imaging shows large strategy dependent differences in neural activity in excitatory, Sst inhibitory, and Vip inhibitory cells in response to both image changes and image omissions. In contrast, task engagement has limited effects on neural population activity. We find the diversity of neural correlates of strategy can be understood parsimoniously as increased activation of the Vip-Sst disinhibitory circuit during the visual comparison strategy which facilitates task appropriate responses.

## Introduction

Circuitry across the brain, including sensory cortex, does not operate in isolation but rather serves behavioral demands. As such, quantitative behavioral analysis is an essential step in detailed understanding of brain circuits (Carandini 2012; Gomez-Marin et al. 2014; Krakauer et al. 2017; Niv 2021). Recently a suite of computational tools has emerged for precise analysis of behavioral tasks used in neuroscience laboratories including the description of behavioral strategies (Brunton et al. 2013; Berman 2018; Roy et al. 2018; Roy et al. 2021; Ashwood et al. 2022; Jha et al. 2022; Le et al. 2022). These tools vary in their statistical structure but all parameterize a space of possible behaviors which are then constrained by behavioral data. This has led to a greater appreciation of behavioral diversity during laboratory tasks, including across subject variability, and within subject variability across individual behavioral sessions and task learning.

Behavioral strategies have been shown to alter which brain regions and pathways are active during a task. Gilad et al. 2018 found mice used either an active or passive whisking strategy which altered the location of short term memory in the cortex. Bolkan et al. 2022 found that both task difficulty as well as the subject's behavioral state determined how striatal pathways influenced behavior. Other studies have demonstrated strategy dependent changes in neural dynamics across human fMRI (Venkatraman et al. 2009; Yang et al. 2023), rodent wide-field imaging (Pinto et al. 2019), and cellular activity in the fruit fly (Calhoun et al. 2019). Prefrontal structures, including the anterior cingulate cortex and medial prefrontal cortex, have been proposed to track strategy preferences and control strategy execution (Tervo et al. 2021; Domenech et al. 2020; Schuck et al. 2015; Proskurin et al. 2022). Behaviorally relevant signals have also been shown to modify activity in sensory cortex (Tseng et al. 2022) including visual flow (Leinweber et al. 2017; Schneider 2020), amplifying task relevant signals (Kim et al. 2020), dynamically scaling the range of stimulus encoding (Waiblinger et al. 2022), and value signals (Banerjee et al. 2020).

Simultaneously, there has been growing appreciation for the role neural cell types play in

47 mediating specific computations (Pinto et al. 2015; Sylwestrak et al. 2022). Merging lines  
48 of evidence suggest a disinhibitory circuit between vasoactive intestinal peptide-positive (Vip)  
49 interneurons, somatostatin-positive (Sst) interneurons, and excitatory cells (Pfeffer et al. 2013;  
50 Kullander et al. 2021; Campagnola et al. 2022; Karnani et al. 2016). The circuit is disinhibitory,  
51 whereby Vip neurons disinhibit pyramidal activity through inhibition of Sst inhibitory neurons  
52 (Kamigaki 2019). In the visual cortex, the Vip-Sst disinhibition circuit has been implicated in  
53 a variety of computational mechanisms. Millman et al. 2020 found that Vip-Sst antagonism  
54 controlled the dynamic range of stimulus contrast for excitatory cells. Keller et al. 2020 found  
55 that the Vip-Sst disinhibitory circuit mediates the influence of visual context on excitatory cells.  
56 Fu et al. 2014 found that running in mice activates the Vip-Sst disinhibition of excitatory cells.  
57 Finally, anatomical (Williams et al. 2019; Kamigaki 2019; Ma et al. 2021) as well as functional  
58 studies (Pi et al. 2013) demonstrate that top-down feedback is preferentially routed through Vip  
59 neurons, influencing local circuits through Vip disinhibition.

60 Despite recent progress in analysis of behavior and cell type circuit dissection, it remains  
61 unclear how behavioral strategies influence cortical circuits through specific cell types. Given  
62 the range of circuit functions mentioned above, the Vip-Sst disinhibitory circuit is a promising  
63 substrate for mediating behavioral strategies. Here we investigate how the Vip-Sst circuit in  
64 visual cortex mediates strategy dependent demands. We used the recently collected Allen Insti-  
65 tute Visual Behavior - 2p calcium imaging dataset to examine how the activity of Vip, Sst, and  
66 excitatory cells depend on strategy preferences during a change detection task (Garrett et al.  
67 2023; brain-map.org). This dataset, collected with the Allen Brain Observatory experimental  
68 pipeline, contains two-photon calcium imaging in genetically defined cell types collected while  
69 mice performed a visual change detection task. This large systematic survey contains behavior  
70 from 376 imaging sessions from 82 mice thus permitting analysis of behavioral diversity. We  
71 used a dynamic logistic regression model (Roy et al. 2018) to identify strategies used by mice on  
72 this task. We find individual mice have stable strategy mixtures of a visual comparison strategy  
73 and a statistical timing strategy. Vip, Sst, and excitatory cells recorded from mice predomi-  
74 nantly using each of these strategies show dramatic differences in activity. Further, the effects  
75 of behavioral strategy were independent from task engagement and stimulus novelty. Finally,  
76 we show that strategy differences can be succinctly described by the degree of activation of the  
77 Vip-Sst disinhibitory circuit.

## 78 Results

### 79 Visual change detection task

80 To examine the relationship between behavioral strategies and cortical circuits, we analyzed  
81 the diversity of behaviors in the Allen Institute Visual Behavior - 2p calcium imaging dataset  
82 (brain-map.org). This public dataset contains 2-photon calcium imaging from transgenic mice  
83 expressing the calcium indicator GCaMP6f in excitatory neurons (Slc17a7-IRES2-Cre;Camk2a-  
84 tTa;Ai93), Sst inhibitory neurons (Sst-IRES-Cre;Ai148), and Vip inhibitory neurons (Vip-IRES-  
85 Cre;Ai148). The data was collected with the Allen Brain Observatory experimental pipeline  
86 which uses standardized data collection and processing (Garrett et al. 2023; de Vries et al. 2020).  
87 We focused our analysis on recordings from two visual areas, V1 and LM, at multiple cortical  
88 depths. During imaging, mice performed a visual change detection task (Fig. 1A). In this task,  
89 head fixed mice were shown a series of natural images (250ms stimulus duration) interspersed  
90 with periods of a gray screen (500ms inter-stimulus duration). This task uses a roving baseline  
91 paradigm whereby an individual image repeats a variable number of times before a new image  
92 is presented and then itself repeats. Mice were given a water reward for licking in response to  
93 image changes. Premature licking delayed the time of the next image change. Further, to serve  
94 as distractors, 5% of image repeats were omitted and replaced with a continuation of the gray  
95 screen for the same duration as image presentations. Image omissions therefore did not disrupt

96 the rhythmic nature of the stimulus. Image changes as well as the image immediately before the  
97 change were not omitted. Mice performed the task on a running disk and were free to run or not  
98 run. Running had no bearing on the task. These mice learned the task through a standardized  
99 training pipeline and were selected for imaging based on a consistent criteria of minimum task  
100 performance (Garrett et al. 2023; Groblewski et al. 2020).

101 Mice could potentially perform this task in multiple ways. In one possible strategy, mice  
102 could hold a memory of the previous image and perform a visual comparison to the subsequent  
103 image. This visual comparison strategy may be vulnerable to distraction from image omissions.  
104 Alternatively, mice could learn the statistical distribution of when images change and make  
105 educated guesses based on the time since the last image change (Fig. 1A). To illustrate these  
106 strategies we can examine licking patterns around time points relevant to each strategy (Fig.  
107 1B). For one example session we can see: (top left) licking aligned to image changes, which  
108 results in a water reward, (top right) licking during image omissions, which never results in a  
109 reward, (bottom left) licking on the image after an omission, which never results in a reward,  
110 and (bottom right) licking on the fifth image after the last lick, which sometimes results in a  
111 water reward. Supplemental Note 1 shows distributions of mouse behavior across the dataset.

112

### 113 Behavioral strategy model

114 In order to identify these strategy patterns across our dataset we used a dynamic logistic regres-  
115 sion model (Roy et al. 2018). Our model predicts whether the mouse will start a licking bout  
116 in response to each image based on the weighted influence of each strategy. Importantly, the  
117 strategy weights were allowed to vary across the course of the session constrained by a smoothing  
118 prior described in detail below.

119 We will now describe how we processed the data and constructed our strategy model (Fig.  
120 1C). First, individual mouse licks were segmented into licking bouts based on an inter-lick interval  
121 of 700ms (Supplemental Note 2A). The duration of licking bouts was largely governed by whether  
122 the mouse received and then consumed a water reward (Supplemental Note 2B). Therefore, we  
123 focused our analysis on the start of each licking bout. Licking bout onsets were time-locked to  
124 image presentations, thus for each licking bout we identified the last image or omission presented  
125 before the bout started (Supplemental Note 2C). Since our model predicts the start of licking  
126 bouts, we ignore image presentations when the mouse was already engaged in a licking bout. The  
127 design matrix of our strategy model is composed of vectors that describe the probability each  
128 strategy would start a licking bout on each image presentation. For the licking bias strategy,  
129 which is simply a bias term, the licking probability is 1 on all images representing a constant  
130 drive to lick. For the visual strategy, the probability is 1 on image changes, and 0 otherwise.  
131 For the omission strategy, the probability is 1 during image omissions, and 0 otherwise. The  
132 post-omission strategy has a probability of 1 during the first image after an omission, and 0  
133 otherwise. For the timing strategy, the licking probability is a sigmoidal function of how many  
134 images have been presented since the end of the last licking bout. The licking probability is low  
135 immediately after a licking bout, rises to 0.5 at 4 images after a licking bout, and then a high  
136 licking probability at longer durations. The parameters of the sigmoidal function were learned  
137 from a subset of the data (Supplemental Note 3). All strategies other than the licking bias were  
138 mean-centered.

139 Using standard, non-dynamic, logistic regression our strategy model would predict the prob-  
140 ability a mouse licked on a given image presentation,  $p(\vec{x}_i)$ , by using fixed weights,  $\vec{\beta}$ , to combine  
141 the strategy vector for that image,  $\vec{x}_i$ , and passing that sum through a logistic function:

$$p(\vec{x}_i) = \frac{1}{1 + e^{-(\vec{\beta}\vec{x}_i)}}. \quad (1)$$

142 However, by using the dynamic logistic regression model, developed in Roy et al. 2018, our model  
143 lets the weight for each strategy,  $k$ , vary for each image presentation subject to a smoothing

144 prior. The prior is implemented as letting the weights for each strategy undergo a random walk  
145 with standard deviation  $\sigma_k$ :

$$\beta_{k,i+1} = \beta_{k,i} + \mathcal{N}(0, \sigma_k^2). \quad (2)$$

146 The smoothing prior  $\sigma_k$  is a hyper-parameter unique to each strategy during each session and  
147 controls the volatility of each strategy. These hyper-parameters were fit to the behavioral data by  
148 maximizing the model evidence as described in Roy et al. 2018. The smoothing prior constrains  
149 the strategy weights to evolve gradually over time. This balances the ability of the model to  
150 dynamically track changing behavioral patterns against over-fitting to the responses on each  
151 stimulus. The dynamic model has the same form as the standard model with the weights now  
152 a function of each image,  $\beta_i$ :

$$p(\vec{x}_i) = \frac{1}{1 + e^{-(\beta_i \vec{x}_i)}}. \quad (3)$$

153 The strategy model was fit to each one-hour behavioral session by the maximum a posteriori  
154 (MAP) estimate of the weights given the data and the hyper-parameters. Figure 1D shows  
155 the example output of the model for one session. For this session the licking bias and timing  
156 strategies have more volatile weights than the visual, omission, and post-omission strategies.  
157 The model successfully captures the time-varying probability of licking in the data as the mouse  
158 goes through epochs of hits, misses, as well as high and low licking rates.

### 159 **Mouse behavior is largely described by the visual and timing strategies**

160 We quantified the performance of the model with the area under the receiver operating char-  
161 acteristic (ROC) curve (Fig. 2A). In this analysis we use the model's cross validated licking  
162 probability prediction on each image as a classifier of whether the mouse started a licking bout  
163 on each image presentation. The ROC curve computes the true positive rate and false positive  
164 rate of a classifier as the classification threshold is varied. The area under this curve (AUC)  
165 ranges from .5 (classifier at chance), to 1 (perfect classification across all thresholds). The static,  
166 or standard, logistic regression model performs poorly, often at chance. The dynamic model per-  
167 forms well, with an average AUC value of 0.83. See Supplemental Note 4 for additional model  
168 validation details.

170 For each behavioral session we can analyze the best fitting strategy weights (Fig. 2B) and  
171 the smoothing prior for each strategy (Fig. 2C). The weights are multiplied against the strategy  
172 design matrix and then passed through the logistic function. The licking bias strategy sets the  
173 average licking probability on each image presentation. A licking bias weight of 0 would translate  
174 to a 50% licking probability, with smaller weights leading to lower licking probabilities, and larger  
175 weights leading to higher licking probabilities. The other strategies are mean-centered (the sum  
176 of their strategy design vectors equals 0), which means we can interpret the strategy weights  
177 relative to the licking bias term. A weight of 0 would have no influence on the licking probability,  
178 a negative weight would result in less licking than the bias term, and a positive weight would  
179 result in more licking than the bias term. Across our population, the omission strategy has a  
180 negative value, meaning on average mice are less likely to lick during image omissions. The  
181 other three strategies have, on average, positive values, meaning mice are more likely to lick on  
182 the image after an omission (post omission strategy), on image changes (visual strategy), and at  
183 the expected image change frequency (timing strategy). However there is significant variability  
184 across the behavioral sessions. Supplemental Note 5 shows additional characterization of how  
185 strategy weights are correlated with the number of hits, misses, and licking probability within  
186 each session. The smoothing priors for each strategy govern how variable the strategy weights  
187 can be within each session from image to image, and constrain the strategy weights to evolve  
188 gradually over time. On average the strategies have smoothing priors within the same order  
189 of magnitude, with the licking bias and timing strategies generally being the most variable.  
190 However, there is significant variability across behavioral sessions.

191 To evaluate the importance of each strategy, we measured the reduction in model evidence  
192 after removing each strategy (Fig. 2D). The model evidence, or marginal likelihood, measures  
193 the probability of the data given the hyper-parameters after integrating over possible parameter  
194 values. Model comparison metrics such as Bayes factor and Bayesian information criterion are  
195 based on comparing the model evidence of two models. In general, if the model evidence decreases  
196 after removing a strategy then the model performs worse at describing the data. We did not  
197 evaluate the model evidence without the licking bias term because it sets the average licking  
198 rate and removing it breaks the model in a trivial manner. Across our population, removing  
199 the omission strategy does not lead to a reduction in model evidence. We therefore conclude  
200 that the omission strategy is not a meaningful descriptor of mouse behavior. Removing the  
201 post omission strategy leads to a small decrease in model evidence, demonstrating a minor role  
202 in describing mouse behavior. Removing the visual and timing strategies leads to significant  
203 decreases in model performance, albeit with large variability across behavioral sessions.

204 We focused the rest of our analysis on the visual and timing strategies based on three ob-  
205 servations. First, the lack of change in model evidence for the omission strategy. Second, we  
206 observed a strong correlation between the post omission strategy and visual strategy in terms of  
207 both the changes in model evidence, and their average weights (Fig. 2E). Third, after performing  
208 PCA on the matrix of changes in model evidence, we found the top two principal components  
209 explained 99.04% of the variance and are closely oriented with the timing and visual strategies  
210 respectively (Supplemental Note 6).

211 Plotting the change in model evidence from the visual and timing strategies against each  
212 other we find that there is a continuous spectrum of behaviors that mix the visual and timing  
213 strategies together (Fig. 2F). We term the strategy index as the difference in the change of model  
214 evidence between the visual and timing strategies. A positive strategy index value indicates the  
215 session was well described by the visual strategy. A negative strategy index indicates the session  
216 was well described by the timing strategy. Plotting the strategy index against the rewards earned  
217 per session we see that all strategy mixes are able to earn a significant number of rewards per  
218 session (Fig. 2G). However higher values of the strategy index tend to result in higher number of  
219 earned rewards. Individual mice were fairly stable in their strategy preferences across multiple  
220 behavioral sessions (Fig. 2H, up to 4 sessions per mouse performed during calcium imaging).  
221 Mouse identity explains 72% of the variance in the strategy index across imaging sessions.  
222 Consistent with this finding we did not observe mice switching between strategies within a  
223 behavioral session. Further, strategy preferences emerged gradually over training (Supplemental  
224 Note 7). Taken together we find individual mice develop unique strategy preferences between  
225 the visual and timing strategies that are stable over many days.

226 Given that strategy preferences are stable over multiple days, the remaining analyses cate-  
227 gorize each behavioral session by the dominant strategy (equivalently, the sign of the strategy  
228 index). We refer to sessions best described by the visual strategy (positive strategy index)  
229 as visual strategy sessions. Likewise, we refer to sessions best described by the timing strategy  
230 (negative strategy index) as timing strategy sessions. Figure 2I illustrates 90 seconds of behavior  
231 from each of the two dominant strategies. Supplemental Note 8 provides additional characteri-  
232 zation of the behavior for each of the two strategies.

233

### 234 **Task strategy is distinct from task engagement**

235 Rather than switching strategies during a session, we observed that mice had clear patterns  
236 of disengagement when they stopped licking altogether. To demonstrate this we generated  
237 a contour plot of the licking bout rate and reward rate aggregated across all the behavioral  
238 sessions (Fig. 3A). Mouse behavior is clearly divided between two regions. One region, which  
239 we term disengaged behavior, has low licking rates and low reward rates. The other region,  
240 which we term engaged behavior, is much broader, encompassing a wider range of licking and

241 reward rates. We define a simple threshold for disengagement as licking bout rates below 1  
242 bout/10 s, and reward rates below 1 reward/120 s. On average, mice are engaged 60.1% of the  
243 time. Figure 3B shows an illustrative example session in which the mouse transitions from task  
244 engagement to disengagement.

245 In order to determine if task engagement was related to task strategy, we plotted the average  
246 strategy weights across the same landscape of licking bout and reward rates. Both the visual  
247 strategy weights (Fig. 3C) and timing strategy weights (Fig. 3D) are at their lowest values in  
248 the disengaged region. In the engaged region, the visual strategy is highest in the upper left  
249 when the ratio of rewards to licks is maximized. This can be understood as the visual strategy  
250 efficiently transforming licking bouts into rewards. The timing strategy is highest in the lower  
251 end of the engaged region, which can be understood as the timing strategy requiring more false  
252 alarm licks to generate rewards. From this analysis we conclude that task engagement is separate  
253 from each of the dominant strategies.

254 Next, we asked if the temporal pattern of engagement across each session was related to  
255 task strategy (Fig. 3E). For both strategies, engagement is highest at the start of the ses-  
256 sion and gradually decreases throughout the session, presumably as the mice become sated. A  
257 slightly higher percentage of timing strategy sessions are in the engaged state at each time point,  
258 presumably because the timing strategy requires more trial and error to earn water rewards.

259 Finally, we asked if the timing of licking was altered during disengaged periods by plotting  
260 histograms of when each licking bout started with respect to the latency since the last image  
261 presentation (Fig. 3F). By definition, the engaged periods have more licking bouts. However  
262 we see the disengaged licking bouts have altered timing relative to stimulus presentations. The  
263 engaged licking is time-locked to image onset, with the peak response time around 400ms.  
264 Disengaged licking lacks this clear time-locking to image onset. This pattern holds true for both  
265 behavioral strategies. Both visual and timing strategy sessions have clear time-locked responses  
266 in engaged epochs (Fig. 3G), and both lack clear time-locked responses in disengaged epochs  
267 (Fig. 3H). The fact that engaged licking in timing strategy sessions is time-locked to image  
268 presentations demonstrates that mice performing the timing strategy understand that rewards  
269 are tied to image presentations, and are synchronizing their timing-based guesses to image onsets  
270 rather than randomly licking without regard to the stimulus.

271 We conclude that mice performing both strategies go through periods of engaged and dis-  
272 engaged behavior, which is a separate dimension of behavior from their strategy preferences.  
273 Mice performing both strategies gradually disengaged over the course of the one hour behav-  
274 ioral session as they got sated by water rewards. Finally, mice performing both strategies have  
275 image-locked licking while engaged, and randomly timed licking when disengaged.

## 276 **Strategy is reflected in neural activity across the Vip-Sst microcircuit**

277 We next wanted to assess whether the dominant behavioral strategy would be reflected in neural  
278 activity. To answer this question we turned to two-photon calcium imaging recordings during  
279 mouse behavior. We focused our analysis on two cortical visual areas, V1 and LM (Fig. 4A).  
280 Calcium imaging was performed in transgenic mice expressing the calcium indicator GCaMP6f in  
281 specific cell populations: excitatory neurons, Sst inhibitory neurons, and Vip inhibitory neurons.  
282 Recent surveys of neural cell types have proposed a taxonomy in which excitatory neurons and  
283 GABAergic neurons are classes, and Sst and Vip neurons are subclasses of GABAergic neurons  
284 (Tasic et al. 2018). In this paper, for simplicity we refer to excitatory, Sst, and Vip as cell  
285 classes. Each cell class was recorded in separate mouse populations. These three cell classes  
286 are thought to form a cortical microcircuit whereby Sst and Vip reciprocally inhibit each other  
287 (Fig. 4B). The dataset contains imaging while mice performed the task with both familiar and  
288 novel stimuli. Novel stimuli have dramatic effects on neural activity (Garrett et al. 2023), so we  
289 restricted our analysis to imaging during familiar image sessions. Our neural dataset contains  
290

291 8,619 excitatory cells (21 imaging sessions, 9 mice), 470 Sst cells (15 imaging sessions, 6 mice),  
292 and 1,239 Vip cells (21 imaging sessions, 9 mice). We performed all of our analyses on discrete  
293 calcium events that were regressed from the raw fluorescence traces, thus removing the slow  
294 decay dynamics of the calcium indicator GCaMP6f (Fig. 4C). The extracted calcium events are  
295 of variable magnitude and correspond to a transient increase in internal calcium levels.

296 Our neural analysis examines how each cell class responds to three stimulus types: image  
297 repeats, distracting image omissions, and image changes (Fig. 4D). We grouped cells by the  
298 dominant strategy used by the mouse during the behavioral session in which they were recorded.  
299 We first asked how each cell class responds to image repeats, and if strategy affects responses  
300 to image repeats. Excitatory and Sst cells respond to each repeated image presentation with  
301 no difference in the population average between strategies. Excitatory cells are image selective,  
302 with each cell typically responding to only one of the 8 images presented during the session. In  
303 contrast Sst cells are broadly image tuned, thus the population average for excitatory cells is an  
304 order of magnitude smaller than Sst cells. Vip cells are suppressed by image presentations and  
305 ramp their activity between image presentations. Notably, Vip cells from visual strategy sessions  
306 showed significantly larger activity ramps between image presentations (Average calcium event  
307 magnitude +/- hierarchically bootstrapped SEM, visual 0.0096 +/- 0.00094, timing 0.0070 +/-  
308 0.00092,  $p=0.025$ ). We assessed significance and report the standard error of the mean (hb.  
309 SEM) by performing a hierarchical bootstrap (Saravanan et al. 2020). In summary, excitatory  
310 and Sst cells showed no strategy differences in response to image repeats, while Vip cells from  
311 visual strategy sessions showed increased activity between image repeats compared to cells from  
312 timing strategy sessions.

313 We next asked if strategy affects how each cell class responds to image omissions. In response  
314 to image omissions excitatory cells show an amplified response on the first image presentation  
315 after the omission, compared with the pre-omission image, with no difference in the population  
316 average between strategies. Sst cells showed significant strategy dependent changes in activity  
317 during the second half of the omission interval. Cells from timing strategy sessions show in-  
318 creasing activity ramping up over the omission interval, while cells from visual strategy sessions  
319 show decreasing activity during the omission interval (Average calcium event magnitude +/-  
320 hb. SEM, visual 0.0052 +/- 0.0021, timing 0.019 +/- 0.0054,  $p=0.0037$ ). Sst cells from both  
321 strategies show decreased responses on the first image presentation after the omission compared  
322 to the pre-omission image. Vip cells show large ramps of activity during the omission interval  
323 with significant differences between strategies (Average calcium event magnitude +/- hb. SEM,  
324 visual 0.036 +/- 0.0038, timing 0.019 +/- 0.0022,  $p=0.00$ ). In summary, Sst cells from visual  
325 strategy sessions show lower activity following omissions compared to cells from timing strategy  
326 sessions, while Vip cells from visual strategy sessions show increased ramping activity following  
327 omissions compared to timing strategy sessions.

328 We then asked if strategy affects how each cell class responds to image changes, including both  
329 hits (mouse licked) and misses (mouse did not lick). In response to image changes we see strategy  
330 dependent differences across all three cell classes. Figure 4E shows summary quantification of  
331 differences between hits and misses for each strategy.

332 We find excitatory cells from visual strategy sessions show greater activity in response to  
333 hits compared to cells from timing strategy sessions (Average calcium event magnitude +/- hb.  
334 SEM, visual hit 0.014 +/- 0.0017, timing hit 0.0097 +/- 0.0014, visual hit vs timing hit  $p=0.04$ ).  
335 Further, we find a significant difference between hits and misses for cells from visual strategy  
336 sessions, but not for cells from timing strategy sessions (Average calcium event magnitude +/-  
337 hb. SEM, visual hit 0.014 +/- 0.0017, visual miss 0.0081 +/- 0.0010, timing hit 0.0097 +/-  
338 0.0014, timing miss 0.0080 +/- 0.00095, visual hit vs visual miss  $p=0.0025$ ). For Sst cells, cells  
339 from visual strategy sessions show lower activity during the interval after hits compared to cells  
340 from timing strategy sessions (Average calcium event magnitude +/- hb. SEM, visual hit 0.0015

341 +/- 0.00074, timing hit 0.013 +/- 0.0032, p=0.00). Further we find lower Sst activity following  
342 hits compared to misses for Sst cells from visual but not from timing strategy sessions (Average  
343 calcium event magnitude +/- hb. SEM, visual hit 0.0015 +/- 0.00074, visual miss 0.0059 +/-  
344 0.0021, timing hit 0.013 +/- 0.0032, timing miss 0.0098 +/- 0.0022, visual hit vs visual miss  
345 p=0.010). For Vip cells, in the interval before the image change we find significant differences  
346 in activation between the two strategies as well as between hits and misses for cells from visual  
347 but not from timing strategy sessions (Average calcium event magnitude +/- hb. SEM, visual  
348 hit 0.016 +/- 0.0022, visual miss 0.011 +/- 0.0011, timing hit 0.0070 +/- 0.00076, timing miss  
349 0.0072 +/- 0.00087, visual hit vs visual miss p=0.037, visual hit vs timing hit p=0.00, visual  
350 miss vs timing miss p=0.0003). In summary, cells from visual strategy sessions show differential  
351 activity in all three cell classes between hits and misses, while cells from the timing strategy  
352 shows no modulation between hits and misses. Further, we see strategy dependent differences  
353 in neural activity in responses to hits across all three cell types: excitatory cells from visual  
354 strategy sessions show greater activity after hits compared to cells from timing strategy sessions,  
355 Sst cells from visual strategy sessions show lower activity following hits compared to cells from  
356 timing strategy sessions, and Vip cells from visual strategy sessions show greater activity before  
357 hits and misses compared to cells from timing strategy sessions.

358 Vip cells are known to be modulated by locomotion (Fu et al. 2014). This effect is seen in  
359 our data most visibly in figure 4D when the mice stop running after image changes to consume  
360 their water reward. With this in mind, we wanted to know whether the strategy differences we  
361 observe could be due to differences in running speed or patterns. To answer this we looked at  
362 the Vip response amplitude to images and omissions as a function of running speed (Fig. 4F,G).  
363 Broadly, we observe Vip activity in cells from visual strategy sessions is equal to or greater  
364 than cells from timing strategy sessions across all running speeds. From this we conclude that  
365 strategy differences in Vip cell activity cannot be a result of different running speeds or patterns.

### 366 **Microcircuit disinhibition dynamics are amplified in the visual strategy**

367 In order to make sense of the diverse strategy differences we observe in figure 4 we now turn  
368 to the Vip-Sst microcircuit as a unifying model (Fig. 5A). We first asked how the microcircuit  
369 components respond as a system to each stimulus type. We thus examined the neural population  
370 averages grouped by strategy allowing a direct comparison across cell classes (Fig. 5B). We  
371 emphasize here each cell class was recorded in a separate population of mice. Viewing the neural  
372 population averages in this manner highlights that excitatory and Sst cells are image responsive,  
373 while Vip cells are inhibited by image presentations. Notably Vip cells show ramping between  
374 image presentations. We can further condense this information by showing the three cell classes  
375 in a 3D state space plot (Fig. 5C), or for clarity in a 2D state space between excitatory and Vip  
376 cells. These state space plots reveal the dynamics of the three cell classes as a periodic cycle  
377 corresponding to the rhythmic stimulus presentations where the two strategies differ primarily  
378 in the Vip activation between image presentations. Importantly, in this periodic cycle excitatory  
379 and Sst cells are tightly correlated, each responding to image presentations, while Vip cells are  
380 suppressed by image presentations. Supplemental Note 9 shows 3D state space plots and all  
381 2D state space combinations of cell classes. We will next consider image omissions and image  
382 changes as perturbations to this underlying microcircuit cycle.

384 Previous work (Millman et al. 2020) found that Vip-Sst antagonism regulates the gain of  
385 cortical circuits to broaden the range of stimulus contrast levels excitatory cells can encode.  
386 Comparing the dynamics of Vip and Sst cells in response to image omissions we can see this  
387 antagonism at work (Fig. 5E). When an image is omitted, the Vip cells continue their between-  
388 image ramping until they are finally suppressed by the post-omission image. Sst cells have  
389 smaller responses to the post-omission image compared to the pre-omission image and excita-  
390 tory cells have larger responses to the post-omission image compared to the pre-omission image,



presumably a result of the increased Vip activation. We can interpret this ramping as Vip cells responding to the lack of visual stimulus by amplifying the gain of the cortical circuit via inhibition of Sst cells and disinhibition of excitatory cells. In the state space view of microcircuit dynamics, the image omission is a perturbation to the periodic repeating image cycle. In response to this perturbation, Vip cells activate, releasing excitatory cells from inhibition thereby amplifying the response to the post-omission image before returning to the periodic image cycle on subsequent images. Notably, these gain dynamics are amplified in cells from visual strategy sessions compared to cells from timing strategy sessions (Fig. 5E).

Image changes can also be understood as perturbations to the periodic image cycle. In response to both hits and misses excitatory cells show increased responses. For cells from visual strategy sessions we see notable differences between hits and misses in Vip activity before the image change (Fig. 5F,G). We do not observe these differences for cells from timing strategy sessions (Fig. 4E). One possible interpretation of these data is that mice performing the visual strategy are more likely to make the choice to respond or not based on visual cortex activity. On a trial by trial basis, a more active Vip population may prime excitatory cells for more robust change responses. Thus leading to increased Vip activity before hits compared to misses, increased excitatory activity on hits compared to misses, and decreased Sst activity after hits compared to misses. We emphasize here that the increased excitatory response on hits happens, on average, 200ms before the mouse responds and therefore cannot be interpreted as a reward response. In this interpretation, mice performing the timing strategy are less reliant on visual cortex activity to trigger responses, instead using some internal timing mechanism elsewhere in the brain. Thus, we see no differences in average Vip, Sst, or excitatory activity between hits and misses for timing mice. Increased Vip activity priming visual, but not timing, strategy mice to respond may also explain why visual strategy mice are more likely to respond to the post-omission image (Fig. 2E). In the state space view of microcircuit dynamics, the image change perturbs the ongoing periodic image cycle by elevating excitatory responses. For mice performing the visual strategy, but not the timing strategy, increased Vip activity can amplify excitatory responses and preferentially lead to behavioral responses.

In summary, when comparing between visual and timing strategy circuits, we can succinctly describe the differences in population response to image repeats, omissions, and changes as amplified Vip disinhibition dynamics. Excitatory and Sst cells respond in unison to repeating image presentations, while Vip cells are suppressed by each image presentation, instead ramping their activity between images. This between image ramping is elevated in cells from visual strategy sessions. When images are omitted, Vip cells continue to ramp their activity which in turn suppresses Sst and disinhibits excitatory cells during the post-omission image. This functionally allows Vip cells to calibrate the subsequent gain of excitatory cells, and this mechanism is heightened in cells from visual strategy sessions. Finally, for the visual strategy elevated Vip activity before image changes facilitates increased excitatory responses which in turn potentially leads to mouse licking responses.

### **Trial by trial neural activity is more correlated with behavioral choices for visual strategy mice**

Following the interpretation suggested above that visual strategy mice are more reliant on visual cortical activity to drive choices, we next wanted to determine if the differences in neural activity between strategies were behaviorally relevant on an trial by trial basis. To answer this we used a random forest classifier trained on neural activity to predict either image changes versus repeats (change decoder), or hits versus misses (hit decoder). Decoding was performed on neural activity in the first 400ms after each stimulus presentation. This time window is before the average licking response, and thus largely avoids reward signals.

Across all three cell types, we found that image changes versus repeats could be decoded

441 equally well from cells from visual strategy sessions and timing strategy sessions (Fig. 6A). We  
442 then asked to what degree the image change signals were correlated with animal behavior. Since  
443 we observe differential activity on hits versus misses for cells from visual strategy sessions, but  
444 not cells from timing strategy sessions, we reasoned that change signals in visual cortex should  
445 be more correlated with behavior when mice are performing the visual strategy. We measured  
446 the correlation between the decoder's predictions on image changes (change vs repeat) and the  
447 animal's choice (hit vs miss). For excitatory, but not Vip or Sst cells, we find a stronger correla-  
448 tion for cells taken from visual strategy sessions compared to timing strategy sessions (Fig. 6B).  
449 For excitatory cells, the correlation between behavior and decoder predictions is more than twice  
450 as strong for visual sessions compared to timing sessions. This demonstrates that while image  
451 change information is equally present in neural activity from mice performing both strategies,  
452 it is more correlated with animal choices in visual strategy sessions. This finding is consistent  
453 with the interpretation that mice performing the visual strategy are more dependent on activity  
454 in visual cortex to drive behavioral responses. Finally, we asked how well we could decode hits  
455 versus misses. For excitatory and Vip cells, but not Sst cells, decoder performance was higher  
456 for visual strategy sessions compared with timing strategy sessions.

457

### 458 **Engagement state has limited modulation of neural activity**

459 We next asked if we could observe neural correlates of task engagement. Similar to figure 4D,  
460 we plotted the average neural activity aligned to either image omissions or image changes but  
461 now additionally split by engaged and disengaged states (Fig. 7). The disengaged state does  
462 not contain hits, so we restricted our comparison to misses. Excitatory cells from visual strat-  
463 egy sessions, but not timing strategy sessions, show elevated responses to misses when engaged  
464 compared to disengaged (Average calcium event magnitude +/- hb. SEM, visual engaged 0.010  
465 +/- 0.0016, visual disengaged 0.0069 +/- 0.00088,  $p = 0.032$ ). We do not observe any other sig-  
466 nificant differences between average neural activity in engaged and disengaged states for either  
467 dominant strategy across any cell type. Further, we do not see major differences in Vip activity  
468 even when controlling for running speed differences during engagement periods (Supplemental  
469 Note 10). Thus, we conclude that the effects of strategy are separate from task engagement.

470

### 471 **Both dominant strategies show robust effects of image novelty**

472 Our analysis to this point has examined neural activity when mice are shown familiar stimuli they  
473 have seen many times. The Allen Institute Visual Behavior - 2p calcium imaging dataset also  
474 contains neural activity in response to novel stimuli. Garrett et al. 2023 examined this data and  
475 found exposure to novel stimuli dramatically altered neural activity, finding striking effects across  
476 all three recorded cell classes. We sought to extend the results reported in Garrett et al. 2023 by  
477 asking two questions. First, behaviorally, does strategy change with novel stimuli? Second, how  
478 do cells from each dominant strategy respond to novel stimuli? Supplemental Note 11 answers  
479 both questions. Analyzing behavior, we see a small but significant shift in strategy preference  
480 towards the visual strategy on the novel image session. This shift manifests as most mice  
481 slightly increasing their strategy index, rather than individual mice making dramatic changes in  
482 strategy. Analyzing neural activity we see cells from both strategies show the effects of novelty  
483 documented in Garrett et al. 2023. Further, on the novel session the primary effects reported in  
484 figure 4 are still present. Namely, Vip cells from visual strategy sessions had increased activity  
485 on image omissions, and before hits compared to cells from timing strategy sessions. As well as  
486 increased excitatory activity for hits compared to misses for cells from visual strategy sessions  
487 but not from timing strategy sessions. We conclude the effects of stimulus novelty are largely  
488 separate from strategy preference.

## Discussion

The Allen Institute Visual Behavior - 2p calcium imaging dataset (brain-map.org) is a large scale survey of neural activity in three neural cell classes in the context of a change detection task. We sought to identify behavioral strategies used by mice in this dataset. Using a dynamic logistic regression model we found that mice have unique mixtures of two strategies, a visual comparison strategy where mice respond to image changes, and a statistical timing strategy where mice respond at the expected duration between image changes. Individual mouse strategy preferences were relatively stable over multiple behavioral sessions and emerged gradually over training. Separately from strategy preference, we found mice have periods of task engagement and disengagement. Mice performing either strategy gradually disengaged from the task throughout each behavioral session. For both dominant strategies, engaged licking was time-locked to stimulus presentations, while disengaged licking was not time-locked to stimulus presentations.

We then analyzed neural activity based on the dominant strategy preference. We found a diversity of neural correlates of strategy across excitatory, Sst inhibitory, and Vip inhibitory cell classes. We found that this diversity of responses can be understood through the lens of the Vip-Sst disinhibitory circuit. In response to image omissions, Vip cells increase their activity to change the gain on excitatory cells. In visual strategy sessions, this Vip gain dynamic is amplified. Further, in visual strategy sessions, but not timing strategy sessions, Vip activity is elevated before hits compared to misses, suggesting Vip cells potentiate excitatory cells and bias the decision to respond to each image presentation in mice performing the visual strategy. Supporting the view that visual strategy mice are more reliant on visual cortical activity, we found stronger hit decoding from visual strategy sessions, and the performance of an image change decoder is more correlated with animal behavior in visual strategy sessions. Additionally, the visual strategy mice show increased post-omission licking compared to timing strategy mice, suggesting Vip omission activity potentiates excitatory responses on the post-omission image.

Despite clear effects of task strategy, we found only limited neural correlates of task engagement. Excitatory cells from visual strategy sessions show elevated responses to misses when engaged. This suggests the effects of strategy influence neural circuits on longer timescales. Additionally, we found the effects of strategy preference persist when the mice perform the task with novel stimuli, despite robust changes to population activity. Our findings demonstrate that behavioral strategy alters neural activity within visual cortex, and is mediated by specific cell classes.

### Behavioral diversity

We note that it could have been possible to alter our training pipeline to push mice away from the timing strategy, skip over mice performing the timing strategy for neural imaging, or post-hoc exclude their data from neural analysis. Indeed, such practices are common in neuroscience laboratories where strict experimental control is demanded by the practicalities of limited experimental resources and a desire to clearly isolate single behaviors or computations. Recently there has been considerable discussion over the advantages of naturalistic behavior and tightly controlled laboratory tasks (Juavinett et al. 2018; Musall et al. 2019). Naturalistic behavior offers ethological relevance and behavioral richness, while laboratory tasks can isolate behaviors and yield reproducibility. Our findings demonstrate a middle ground, through the use of large scale brain observatories with a behavioral task that subjects can solve in multiple ways. By recording from many mice we find considerable behavioral richness across our population, but still harness the advantages of well defined stimuli and task structure. This approach complements the existing range of behavioral paradigms in the field.

### How do behavioral strategies arise?

We found that strategy preferences emerge gradually over many days of training. How do mice

539 learn their strategy preferences? One possibility is mice could adopt one strategy or another  
540 based on a myriad subtle biases such as visual ability, cognitive ability, or difficulty licking the  
541 reward spout. Alternatively, mice could have been biased to one strategy based on variability  
542 in early behavioral exploration. Given that the visual strategy can earn a greater number of  
543 rewards per session we can consider the timing strategy as a local maximum in behavioral per-  
544 formance that some mice might settle into early in training. Finally, it is possible that prior to  
545 any task training, some mice could already have amplified Vip-Sst dynamics and thus be predis-  
546 positioned to adopting the visual strategy. This predisposition could be the result of genetics,  
547 or life experience. The learning processes that lead mice to each strategy may involve unique  
548 behavioral states and neural mechanisms (Rosenberg et al. 2021; Meister 2022).

### 549 550 **How does strategy preference amplify Vip-Sst circuitry?**

551 We found that the visual strategy resulted in amplified Vip-Sst disinhibition dynamics. If strat-  
552 egy preferences arise from outside visual cortex, then what mechanisms facilitate the diversity  
553 of neural correlates we observe? Vip cells are known to be preferential targets of top-down  
554 feedback (Kamigaki 2019; Ma et al. 2021). One possibility is that external feedback results in  
555 higher tonic activation of Vip cells during visual strategy sessions. Alternatively, neuromodula-  
556 tory input could alter intrinsic Vip firing patterns (F  r  zou et al. 2002; Fu et al. 2014; Pr  nneke  
557 et al. 2020).

558 Strategy preference could also recruit different visual pathways and brain structures (Bolkan  
559 et al. 2022). We found cells from visual strategy sessions, but not timing strategy sessions, show  
560 differential activity between hits and misses. Further, we found a decoder trained to predict  
561 image changes made predictions that were more correlated with the animal’s choices for visual  
562 sessions compared to timing sessions. For excitatory cells, the correlation was more than twice  
563 as strong. These results suggest that the timing mice may execute this task primarily through  
564 other brain structures. We re-iterate here that licking bouts from timing mice are time-locked to  
565 image presentations. This demonstrates timing strategy mice still use visual input, but perform  
566 less processing of the visual stimulus. Retinal ganglion cells project to many sub-cortical struc-  
567 tures (Martersteck et al. 2017), which could facilitate the simpler visual processing required for  
568 the timing strategy.

### 569 570 **Engagement and novelty**

571 Mice performing both dominant strategies displayed periods of task engagement and disengage-  
572 ment (Ashwood et al. 2022). Across both dominant strategies we observed limited modulation  
573 of population activity with task engagement. This may be a puzzling finding, especially given  
574 some similarities between task engagement and visual attention. However, we caution that task  
575 engagement is a separate phenomena from visual attention and care should be taken before  
576 taking inspiration from attentional mechanisms. With this reservation in mind, we do note that  
577 Myers-Joseph et al. 2023 found that attention modulation operates distinctly from Vip disinhi-  
578 bition. Consistent with our findings, Pho et al. 2018 found little modulation of neural activity  
579 by engagement in V1 but significant modulation in posterior parietal cortex.

580 One possibility for a lack of engagement correlates is the nature of our stimuli. Our stimuli  
581 are large full visual field images with relatively high contrast - they are not near perceptual  
582 thresholds. Perhaps our stimuli are salient enough to evoke visual responses regardless of task  
583 engagement. If our task operated at a perceptual threshold we might observe stronger modula-  
584 tion of neural activity by task engagement.

585 The Allen Institute Visual Behavior - 2p calcium imaging dataset contains multiple behav-  
586 ioral dimensions, including novel stimuli. We did not focus on novel stimuli, but Garrett et  
587 al. 2023 found striking changes in neural activity in all three recorded cell classes. We found  
588 strategy alters neural activity in distinct ways from novel stimuli. Since strategy differences

589 are present during both task engaged and disengaged states, it is likely the strategy effects we  
590 observe are the result of long-term learning and firmly established in cortical circuits. This is  
591 further supported by the persistence of strategy differences during the novel stimulus presenta-  
592 tion. The neural correlates of strategy on this task are therefore not a fleeting activity pattern,  
593 or a flexible state to be switched on and off, rather it appears to be a deeply ingrained change  
594 in the cortical circuit that the mouse develops to solve the task consistently well.

595

### 596 **Future directions**

597 A naive view of sensory circuits might expect veridical encoding of the sensory world. However  
598 our findings highlight that task strategy is mediated through changes in neural activity in sensory  
599 cortex. This result raises general questions about how, when, and why cognitive states alter  
600 sensory processing. Future studies should seek mechanistic understanding of how cognitive  
601 states influence local circuit processing in visual cortex, how local circuit processing changes  
602 with learning, and how cognitive states influence the propagation of sensory information up the  
603 visual hierarchy into deeper brain structures.

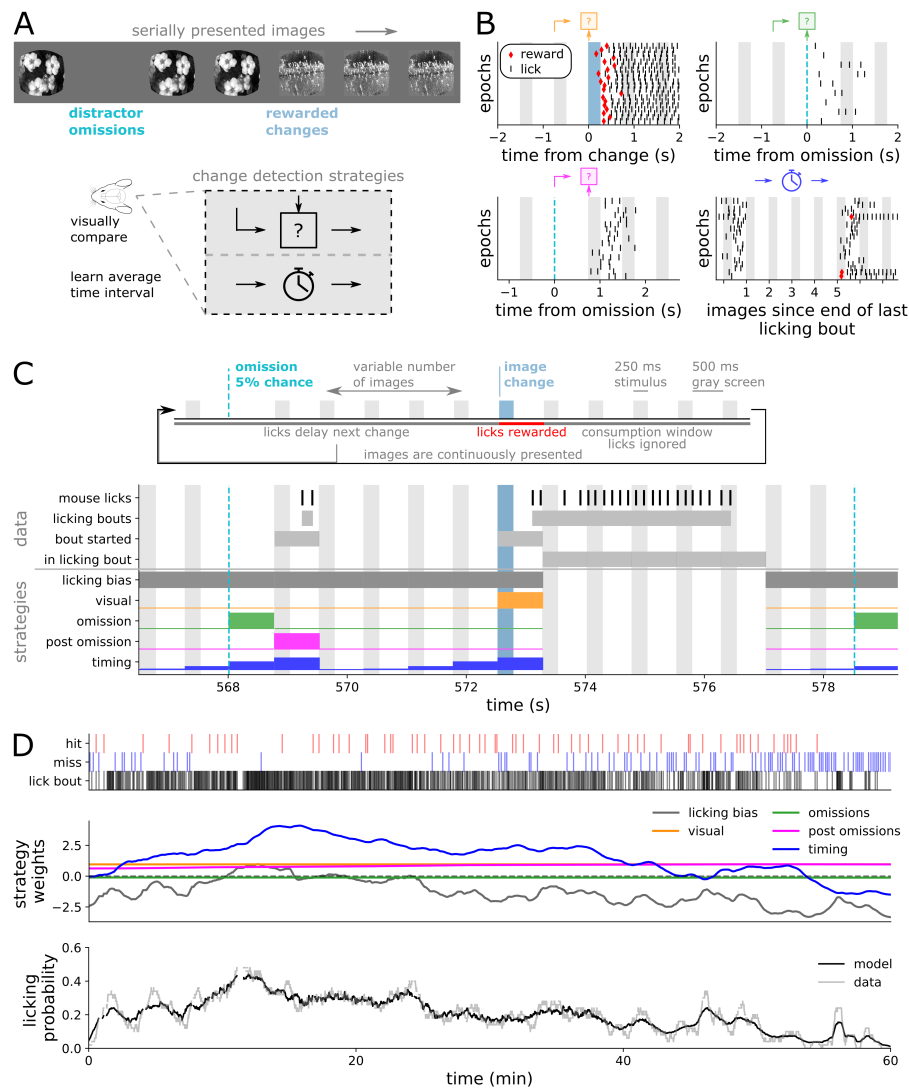

**Figure 1: Quantifying strategies during a change detection task.** (A) Head-fixed mice were shown a stream of natural images and were rewarded for licking in response to image changes. Mice could perform this task using multiple strategies, including visually comparing image presentations or learning statistical distributions of rewards. (B) Example lick rasters demonstrate multiple strategies. Each row is an epoch within one example session. Up to 20 examples for each strategy are shown. Gray bands show time of repeated image presentations. Blue bands show time of change image presentations. Dashed blue lines show time of omitted images. Red markers show time of rewards. Top left - licking aligned to image changes. Top right - licking aligned to image omissions. Bottom left - licking aligned to post-omission images. Bottom right - licking aligned to a fixed time interval from the last licking bout. (C) Diagram of task structure, data processing, and strategies. Images were presented for 250ms with 500ms gray screens interleaved. 5% of all images were randomly omitted. Image changes were drawn from a geometric distribution. Individual licks were segmented into licking bouts. Licking bouts were assigned to the preceding image presentation. The licking model predicts whether a licking bout starts during each image interval, and we therefore ignore image presentations where the mouse was already licking. For each strategy we show the probability of starting a licking bout during each image interval. (D) Top - Raster of licking bouts, hits, and misses for full 1-hour behavioral session. Middle - time-varying strategy weights for each strategy for this example session. Bottom - licking probability in the data and model prediction smoothed with a one minute boxcar.

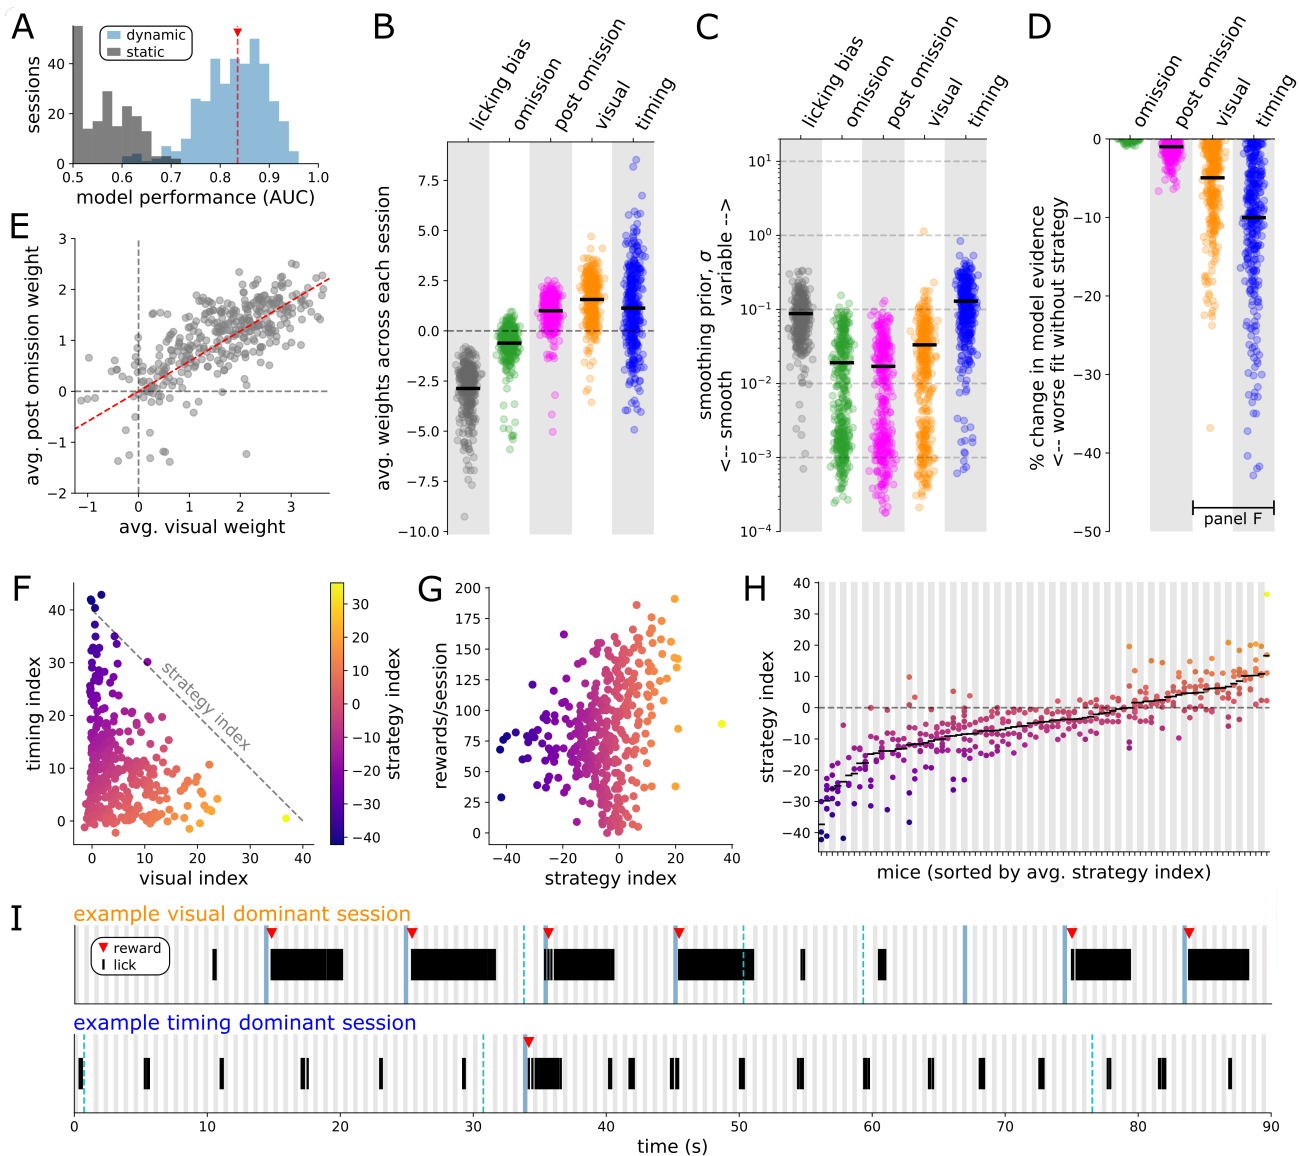

**Figure 2: Licking model reveals distinct task strategies** (A) Cross validated model performance. Histogram of area under the ROC curve for the dynamic model (blue) and static model (gray) for each session ( $n=382$ ). The red line marks the average dynamic model performance (0.83). (B-H) Dots indicate individual sessions ( $n=382$ ), and (B-D) black bars are population averages. (B) Average strategy weights. (C) Learned smoothing prior  $\sigma$  for each strategy. (D) Reduction in model evidence when removing each strategy. The absolute value for the visual and timing strategies is shown in panel F. (E) Average weights of the visual and post-omission strategies. Red line shows a linear correlation ( $R^2 = 0.44$ ). (F) Scatter plot of the absolute value of the reduction in model evidence (termed here as an index) for the visual and timing strategies. The strategy index is defined as the counter-diagonal difference between visual and timing indices. (G) Rewards per session compared with the strategy index. (H) Mice were sorted by their average strategy index. Each session from a mouse is shown in the same column. (I) 90 seconds of illustrative behavior for two example sessions with either a visual dominant strategy (top) or timing dominant strategy (bottom). Gray bands show image repeats, blue bands mark image changes, and dashed blue lines mark image omissions.

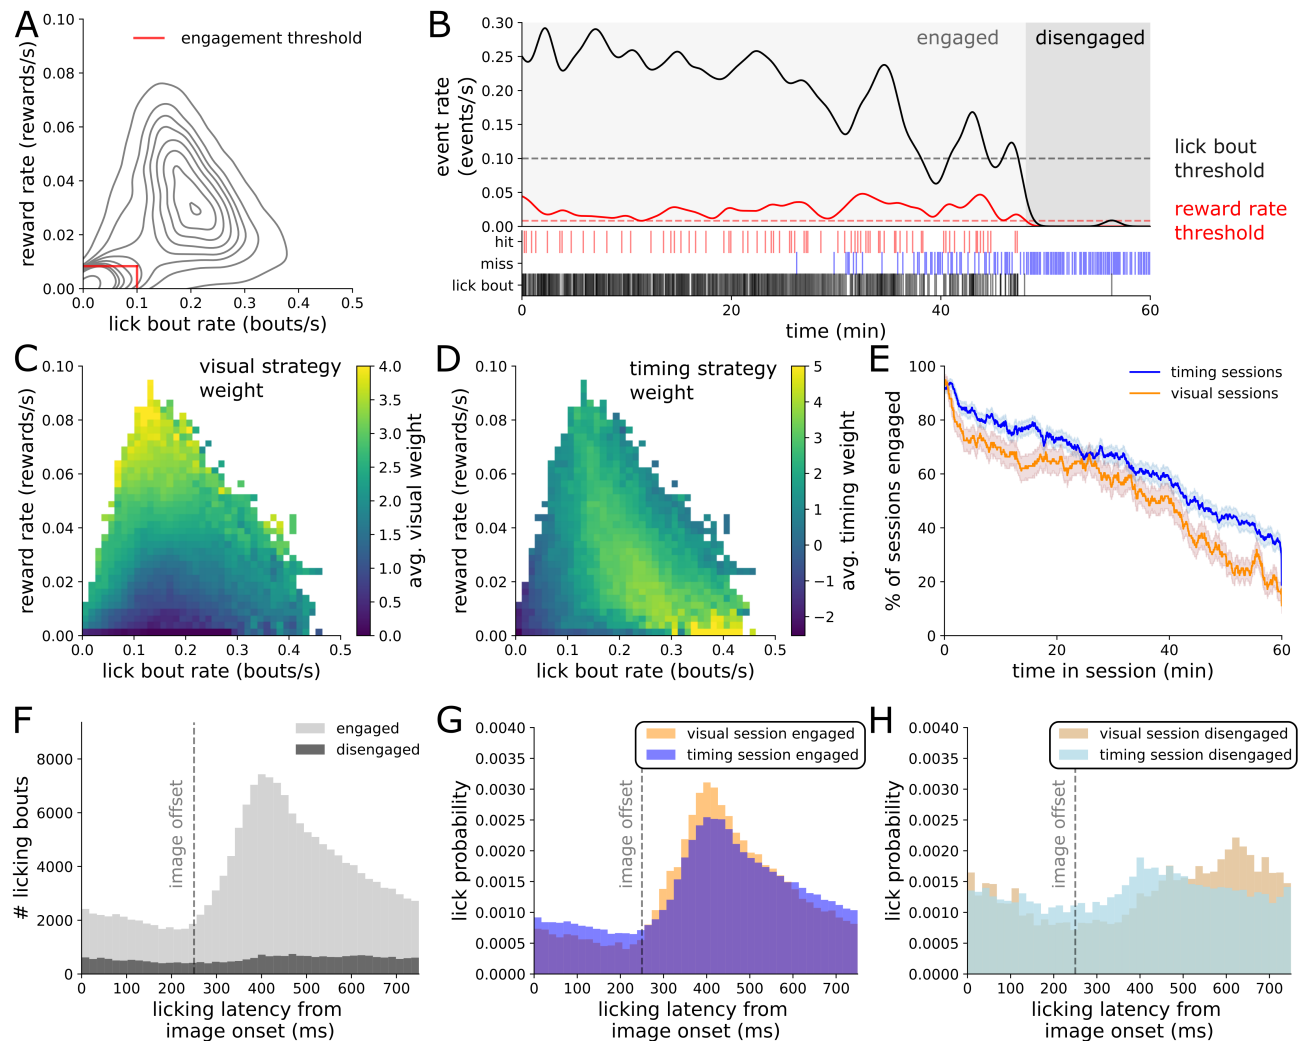

**Figure 3: Strategy is distinct from engagement** (A) Contour plot of reward rate and lick bout rate from all imaging sessions ( $n=382$  sessions, 1,804,462 image intervals). Red line marks our threshold for classifying engaged and disengaged behavior (1 reward/120s, 1 lick bout/10s). 60.1% of image intervals are classified as engaged. (B) Example session showing lick bout rate (solid black), licking engagement threshold (dashed black), reward rate (red), and reward rate threshold (dashed red). (C, D) Average value of the visual and timing strategy weights across a range of licking and reward rates. Both panels show data from all sessions ( $n=382$  sessions, 1.8 million image intervals) across a range of licking and reward rates. (E) Percentage of sessions in an engaged state at each point in the hour long behavioral session, split by dominant strategy. (F) Response latency histogram split by engaged and disengaged epochs. Response latency is defined as the time from the start of each licking bout to the most recent image onset. (G) Response latency histogram for engaged periods, split by visual or timing strategy sessions. (H) Response latency histogram for disengaged periods, split by visual or timing strategy sessions.



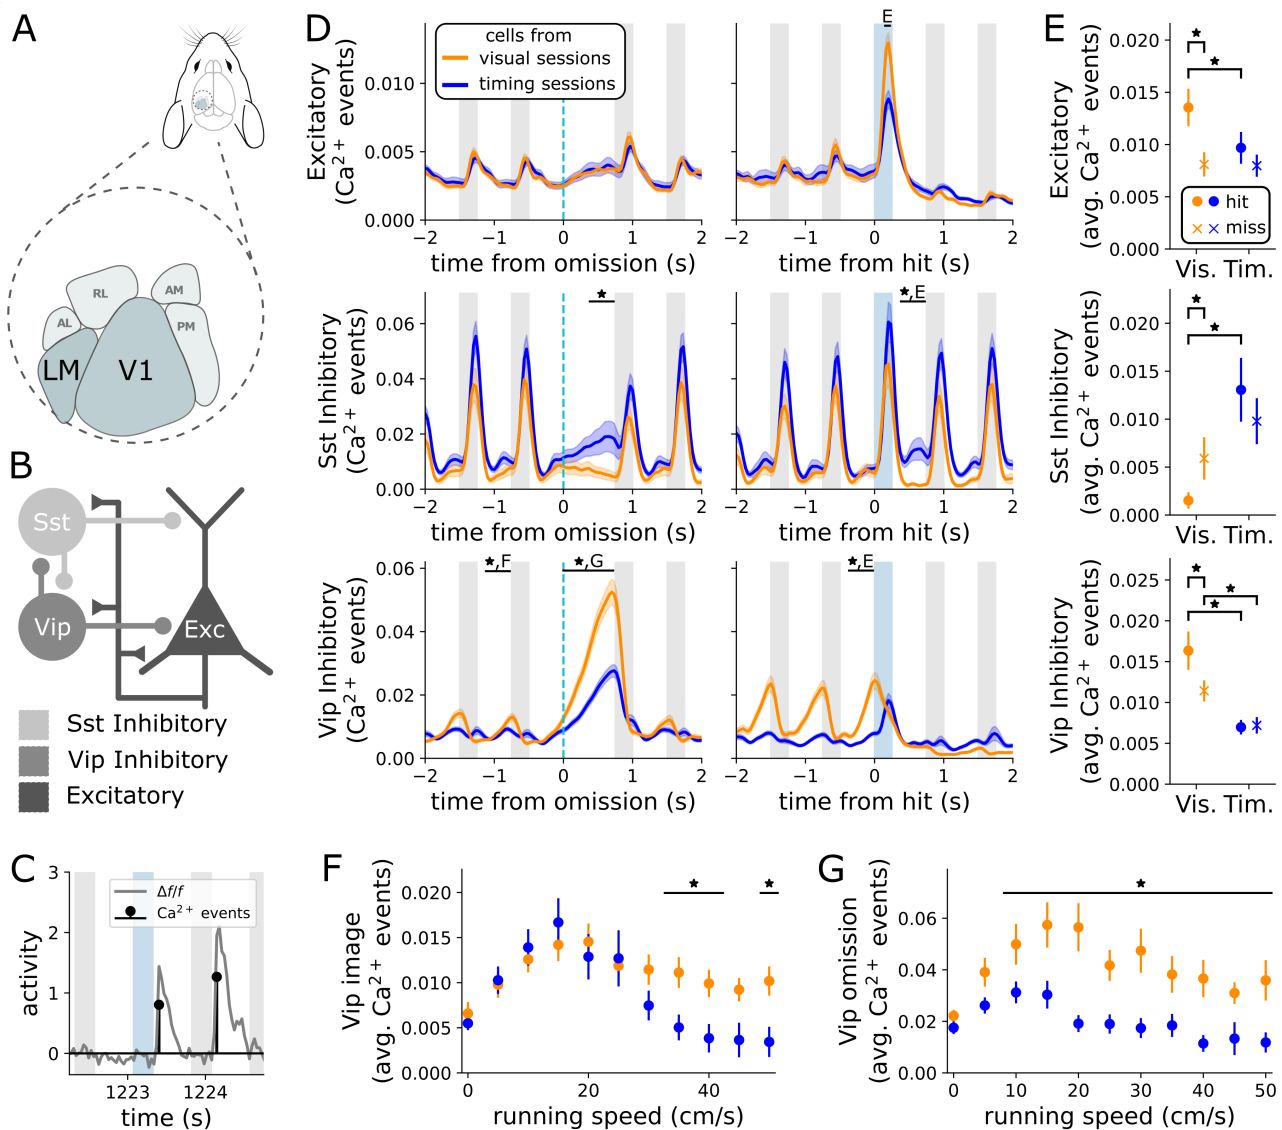

**Figure 4: Neural correlates of behavioral strategy across multiple cell populations.** (A) Two-photon calcium imaging was performed in visual areas V1 and LM. (B) Cartoon of Vip-Sst microcircuit. Vip and Sst inhibitory neurons reciprocally inhibit each other. (C) Discrete calcium events were regressed from the fluorescence traces. (D) Average calcium event magnitude of each cell class aligned to image omissions (left column), and hits (right column), split by dominant behavioral strategy (\* indicates  $p < 0.05$  from a hierarchical bootstrap over imaging planes and cells, corrected for multiple comparisons). (E) Average calcium event magnitude +/- hierarchically bootstrapped SEM in a interval around image changes split by strategy and whether the mouse responded. Excitatory and Sst cells show average events after image changes, (150, 250ms) and (375, 750ms) respectively. Vip cells show average events immediately before image changes (-375, 0 ms). \* indicates  $p < 0.05$  from a hierarchical bootstrap over imaging planes and cells, corrected for multiple comparisons. (F) Average calcium event magnitude +/- hb. SEM in the 750ms interval after image presentations split by running speed and strategy (\* indicate  $p < 0.05$  from a hierarchical bootstrap over imaging planes and cells, corrected for multiple comparisons). (G) Same as F after image omissions.

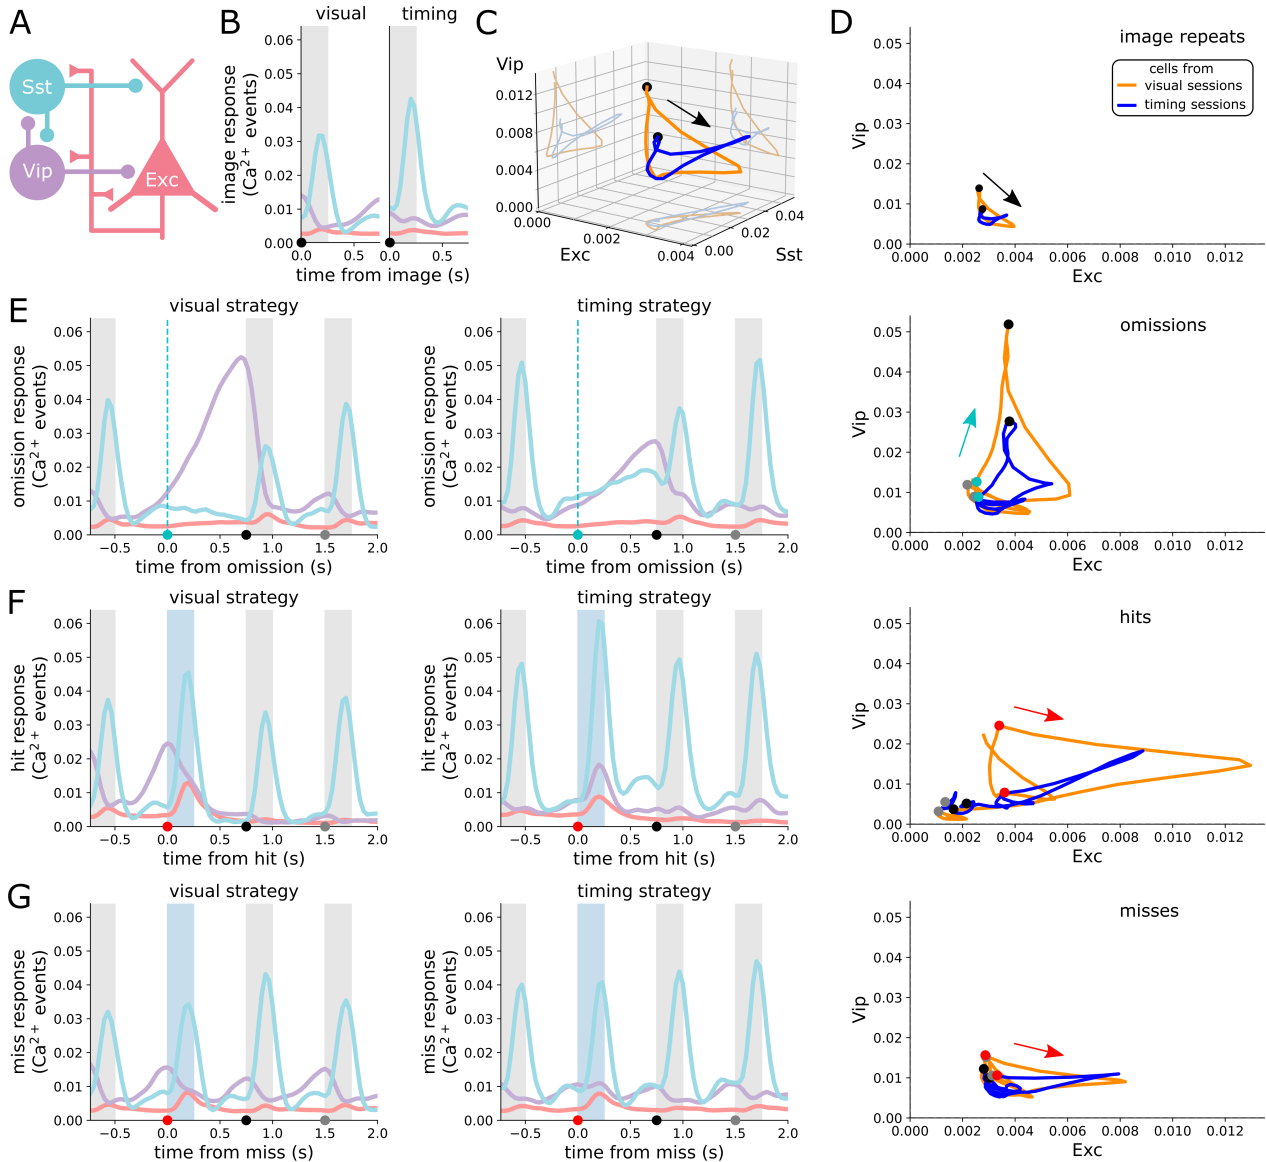

Figure 5: **Microcircuit disinhibition dynamics are amplified in the visual strategy** (A) Cartoon schematic of microcircuit. (B) Population average response to image repeats, grouped by strategy. (C) Population average response to image repeats plotted in 3D space. (D) Population average response to image repeats for excitatory cells against Vip cells. (C,D) Arrow marks forward progression of time. Black circle marks image onset in B. (E) Same as B,D for image omissions. (F) Same as B,D for hits. (G) Same as B,D for misses.

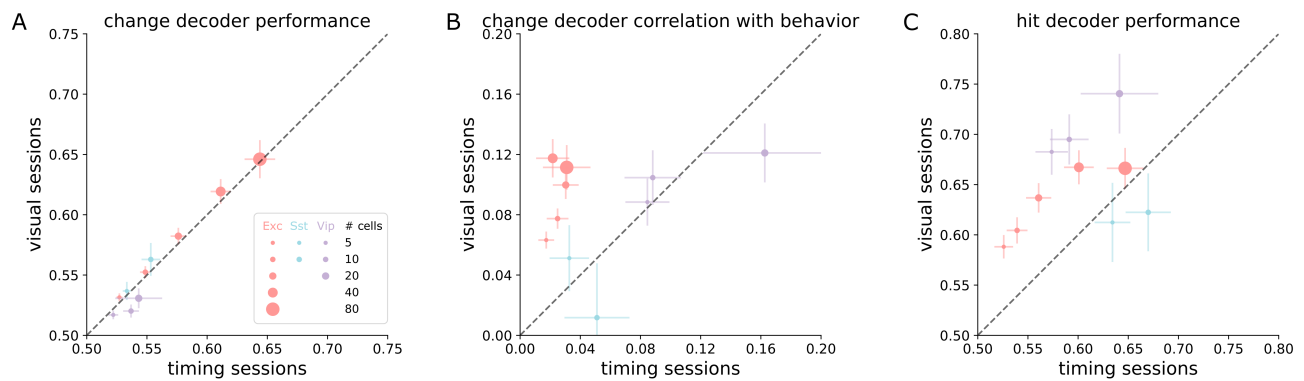

**Figure 6: Stronger behavioral choice signals in cells from visual strategy sessions.** (A-C). Decoding was performed on neural activity in the first 400ms after image presentation. Error bars are SEM over imaging planes. Each cell type is plotted as a separate color, with marker size indicating the number of cells used for decoding from each imaging plane. (A) Cross validated random forest classifier performance at decoding image changes and repeats (% correct). (B) Correlation between decoder prediction on image changes (change vs repeat) and animal behavior (hit vs miss). (C) Cross validated random forest classifier performance at decoding hits and misses (% correct).

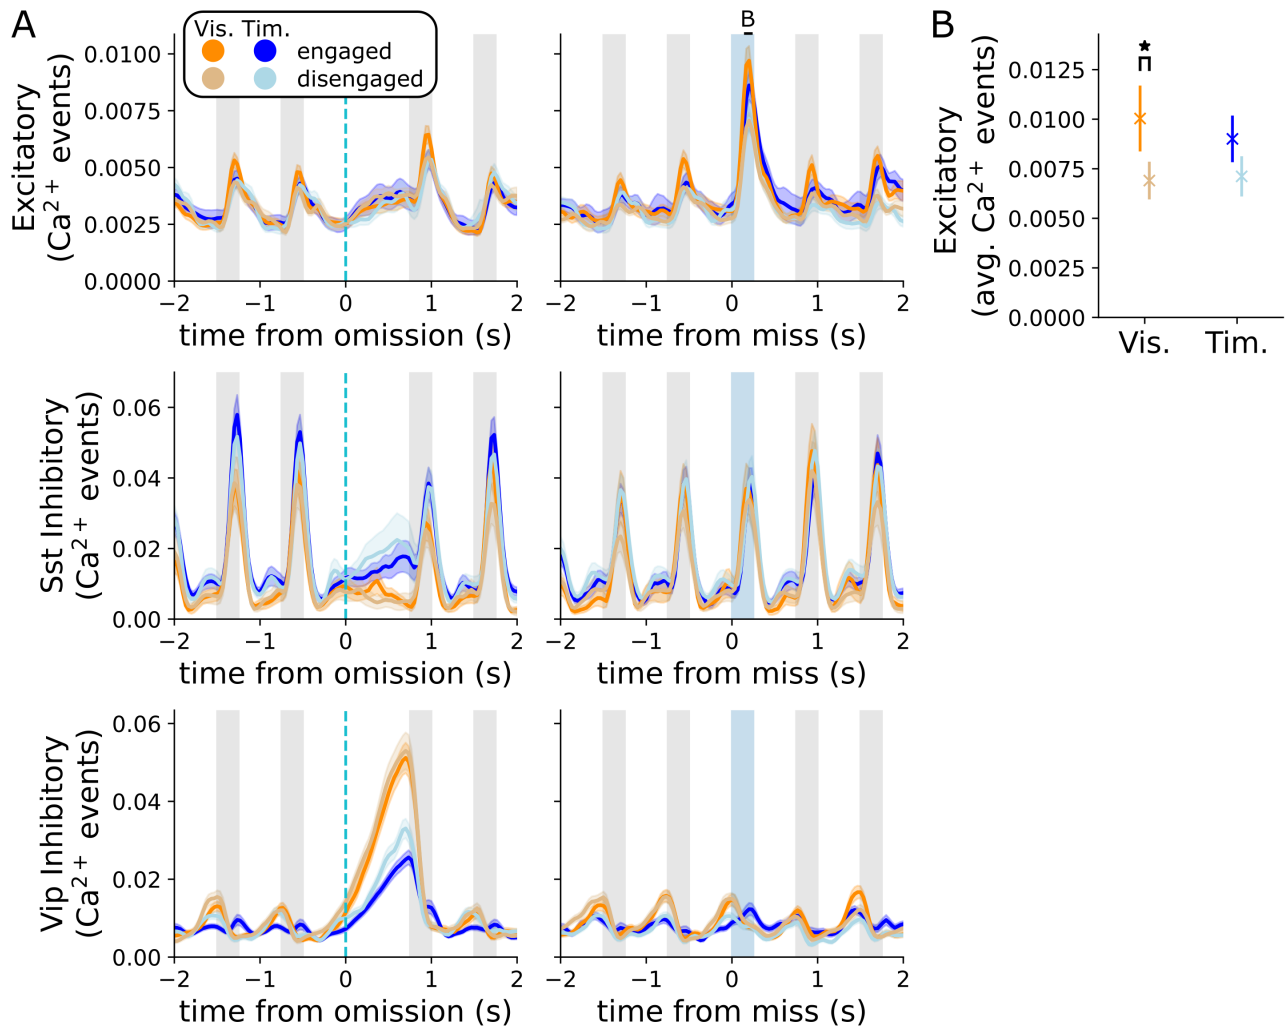

Figure 7: **Task engagement has minor effects on neural population activity.** (A) The average activity of cells from each dominant task strategy, split by epochs of task engagement and disengagement, aligned to either image omissions (left), or image change misses (right). Error bars are +/- SEM. (B) Average calcium event magnitude +/- hierarchically bootstrapped SEM in a interval (150ms, 250ms) around image changes split by strategy and whether the mouse responded. \* indicates  $p < 0.05$  from a hierarchical bootstrap over imaging planes and cells, corrected for multiple comparisons.

## 604 **Methods**

### 605 **Data selection**

606 The collection and processing of all data in the study was previously described in Garrett et al.  
607 2023, and is available at <https://portal.brain-map.org/explore/circuits/visual-behavior-2p>. For our behavioral analysis we used all active behavioral sessions from mice in the  
608 **avior-2p**. For our behavioral analysis we used all active behavioral sessions from mice in the  
609 V1 and LM datasets across all image set experience levels (familiar images, novel images, and  
610 repeated exposure to novel images). For all analyses we combined mice trained on image sets  
611 A and B. For neural analysis we used neurons recorded during familiar image set presentations  
612 on the multi-plane imaging rig. Except where noted we combined across cells from V1 and LM  
613 and across cortical depths.

### 614 **Behavioral data processing**

615 We performed all of our behavioral analysis after assigning behavioral events to each image  
616 presentation interval. By image presentation interval we refer to the 750ms interval beginning  
617 with each image presentation. For image omissions we used the 750ms following the time of the  
618 omission, when the image should have been presented. Licks were segmented into licking bouts  
619 using an inter-lick interval of 700ms. This threshold was determined by visual inspection of the  
620 histogram of inter-lick intervals. The start and end of each licking bout was then assigned to an  
621 image presentation interval.  
622

### 623 **Strategy model**

624 The strategy model predicts whether a licking bout started on each image presentation interval.  
625 We thus excluded from our model fits any image presentation intervals where a licking bout was  
626 on-going at the start of the interval. The licking bias strategy vector was defined as a 1 on every  
627 interval. The visual, omission, and post-omissions strategy vectors were defined as 1 on intervals  
628 with the respective stimulus and 0 otherwise. The timing strategy vector was a number between  
629 0 and 1 based on a sigmoidal function of how many image intervals since the end of the last  
630 licking bout. See supplemental note 3 for details on the timing strategy regressor. Except for  
631 the licking bias, all strategy vectors were then mean-centered.  
632

### 633 **Fitting the strategy model**

634 We fit the strategy model using the PsyTrack package (Roy et al. 2018; Roy et al. 2021, <https://github.com/nicholas-roy/psytrack>). The PsyTrack package fits the model through an  
635 empirical Bayes procedure. The hyper-parameters are first selected by maximizing the model  
636 evidence. Then the strategy weights were determined by the MAP estimate. The model hyper-  
637 parameters and strategy weights were fit separately for every behavioral session.  
638

639 Model performance was determined using the cross-validated model predictions as a classifier  
640 to determine whether a mouse initiated a licking bout on each image interval. The receiver op-  
641 erator curve determines the rate of true positives against false positives as a function of different  
642 classifier thresholds. The area under the curve provides a summary statistic to compare mod-  
643 els. Behavioral sessions were classified as visually dominant or timing dominant by determining  
644 which strategy lead to the greater decrease in model evidence when that strategy was removed.  
645

### 646 **Task Engagement**

647 Task engagement periods were determined by applying a threshold to the reward rate and lick  
648 bout rate. Task engagement was determined for each image presentation interval. Both rates  
649 were calculated by annotating which image presentations intervals had rewards and lick bout  
650 initiation. We then smoothed across image presentations with a filter. We used a Gaussian  
651 filter with standard deviation of 60 images. We then converted both rates into units of events  
652 per second. We set the thresholds of 1 reward per 120 seconds and 1 lick bout per 10 seconds  
653

654 through visual inspection of the behavioral landscape in figure 3A. If either rate was above its  
655 threshold, then the interval was labeled engaged.

656

### 657 **Neural data**

658 For all analysis of neural data we used the detected calcium events as described in Garrett et al.  
659 2023 and <https://portal.brain-map.org/explore/circuits/visual-behavior-2p>. This  
660 process produces, for each cell, a set of calcium events each with a time and magnitude. Except  
661 where noted we used familiar image set sessions collected on the multiplane calcium imaging rig.

662 To generate the population averages traces we compute the behavioral event triggered re-  
663 sponse for each cell to each behavioral event and then average across all cells in each population.  
664 We compute the behavioral event triggered response by isolating the calcium events around the  
665 triggering behavioral event, then linearly interpolating onto a consistent set of 30hz timestamps  
666 relative to the triggering behavioral event. This produces a vector of calcium event magnitudes  
667 for each cell relative to each behavioral event (omission, image change, or repeat).

668 To generate the average calcium response across a time interval, we first compute the event  
669 triggered response for each cell as described above. We then average across all time points in  
670 the same image interval, producing a single scalar for each cell on each image interval. Average  
671 calcium responses were computed for either the entire image interval (50, 800ms), the first half  
672 of each image interval (50, 425ms), the second half of each image interval (425, 800ms), or a  
673 more narrow stimulus locked window for excitatory cells (150, 250ms). We used a 50ms delay  
674 for the image interval, (50, 800ms) rather than (0, 750ms), to account for signal propagation to  
675 visual cortex.

676

### 677 **Hierarchical bootstrap analysis**

678 To determine significance for average calcium response metrics we applied a hierarchical boot-  
679 strap method (Saravanan et al. 2020). On each bootstrap iteration we sampled with replacement  
680 from first imaging planes, and then for each imaging plane we sampled with replacement from  
681 cells from that plane. Averaging across all of these cells produces one bootstrap sample. For  
682 all of our analyses, we used this procedure to generate 10,000 samples. The standard deviation  
683 of this set of samples produces an estimate of the standard error of the mean. To performance  
684 hypothesis testing we assigned samples from each condition into random pairs and performed  
685 pairwise comparisons to determine what fraction of samples from each condition was greater or  
686 less than the other condition. In this context an imaging plane is a specific cortical area and  
687 depth from one behavioral session, so by sampling imaging planes we are effectively sampling  
688 over sessions and mice. We corrected for multiple comparisons through the Benjamini-Hochberg  
689 procedure (Benjamini et al. 2001).

690

### 691 **Running speed**

692 Running speed traces were processed in the same manner as calcium event traces. For each  
693 behavioral session, we computed the event triggered running trace by isolating running time-  
694 points around the triggering behavioral event then linearly interpolating onto a common 30hz  
695 timeseries. We then averaged across all points in the relevant time window.

696

### 697 **Decoding analysis**

698 To decode task signals on an image by image basis we used a random forest classifier to predict  
699 either image changes versus repeats (change decoder), or hits versus misses (hit decoder). We  
700 iterated over the number,  $n$ , of simultaneously recorded neurons used in the decoding analysis.  
701 For each imaging plane we sampled neurons and performed decoding until there was a 99%  
702 probability all neurons had been used in decoding. For each sample we took  $n$  neurons without  
703 replacement and concatenated their neural activity on each image presentation to make a  $k \times nt$

704 matrix  $X$ . Here  $k$  is the number of images, and  $t$  is the number of timesteps from each neuron  
705 on each image. The change decoder used each image change and the image repeat immediately  
706 before the image change. The hit decoder used all image changes. We then performed 5-fold  
707 cross validated decoding using the RandomForestClassifier package from *sklearn*. We evaluated  
708 decoder performance as the percentage of test-set images correctly classified. We averaged the  
709 performance of all samples from the same imaging plane and report summary statistics as the  
710 mean  $\pm$  SEM over imaging planes. We computed the correlation between the change decoder's  
711 predictions and the animal's choices using the phi coefficient.

## 712 Acknowledgements

713 We thank the Allen Institute founder, Paul G. Allen, for his vision, encouragement, and sup-  
714 port. We thank the members of Allen Institute for a fruitful scientific community and helpful  
715 discussions. AP thanks Tyler Boyd-Meredith for comments on the manuscript, and Nick Roy  
716 for developing the dynamic logistic regression model, the associated code package PsyTrack, and  
717 helpful discussions.

## 718 Author contributions

719 AP conceived of the project, performed behavioral and neural analysis, and wrote the paper. NP  
720 and DO performed behavioral analysis. DO, MG, PG, SO, and CK oversaw task development  
721 and data collection. AA oversaw the project.

## 722 Data availability

723 All data used in this study is publicly available at [https://portal.brain-map.org/explore](https://portal.brain-map.org/explore/circuits/visual-behavior-2p)  
724 [/circuits/visual-behavior-2p](https://portal.brain-map.org/explore/circuits/visual-behavior-2p)

## 725 Code availability

726 The behavioral analysis code is available at [https://github.com/alexpiet/licking\\_behav](https://github.com/alexpiet/licking_behavior/)  
727 [ior/](https://github.com/alexpiet/licking_behavior/). The strategy model fits are available at [https://figshare.com/projects/Allen\\_Ins](https://figshare.com/projects/Allen_Institute_Visual_Behavior_Strategy_Paper/160972)  
728 [titute\\_Visual\\_Behavior\\_Strategy\\_Paper/160972](https://figshare.com/projects/Allen_Institute_Visual_Behavior_Strategy_Paper/160972). The neural analysis code is available at  
729 [https://github.com/AllenInstitute/visual\\_behavior\\_glm](https://github.com/AllenInstitute/visual_behavior_glm).

## 730 References

- 731 Ashwood, Zoe C. et al. (Feb. 2022). "Mice alternate between discrete strategies during perceptual  
732 decision-making". *Nature Neuroscience* 25.2, pp. 201–212. ISSN: 1546-1726. DOI: 10.1038/  
733 s41593-021-01007-z.
- 734 Banerjee, Abhishek et al. (Sept. 2020). "Value-guided remapping of sensory cortex by lateral  
735 orbitofrontal cortex". *Nature* 585.7824, pp. 245–250.
- 736 Benjamini, Y et al. (Nov. 2001). "Controlling the false discovery rate in behavior genetics re-  
737 search". en. *Behav. Brain Res.* 125.1-2, pp. 279–284.
- 738 Berman, Gordon J (Feb. 2018). "Measuring behavior across scales". *BMC Biol.* 16.1, p. 23.
- 739 Bolkan, Scott S et al. (Mar. 2022). "Opponent control of behavior by dorsomedial striatal path-  
740 ways depends on task demands and internal state". *Nat. Neurosci.* 25.3, pp. 345–357.
- 741 brain-map.org (2022). URL: [https://portal.brain-map.org/explore/circuits/visual-](https://portal.brain-map.org/explore/circuits/visual-behavior-2p)  
742 [behavior-2p](https://portal.brain-map.org/explore/circuits/visual-behavior-2p).
- 743 Brunton, Bingni W, Matthew M Botvinick, and Carlos D Brody (Apr. 2013). "Rats and humans  
744 can optimally accumulate evidence for decision-making". *Science* 340.6128, pp. 95–98.

- 745 Calhoun, Adam J, Jonathan W Pillow, and Mala Murthy (Dec. 2019). “Unsupervised identifi-  
746 cation of the internal states that shape natural behavior”. *Nat. Neurosci.* 22.12, pp. 2040–  
747 2049.
- 748 Campagnola, Luke et al. (Mar. 2022). “Local connectivity and synaptic dynamics in mouse and  
749 human neocortex”. *Science* 375.6585, eabj5861.
- 750 Carandini, Matteo (Apr. 2012). “From circuits to behavior: a bridge too far?” *Nature Neuro-*  
751 *science* 15.4, pp. 507–509. ISSN: 1546-1726. DOI: 10.1038/nn.3043.
- 752 de Vries, Saskia E J et al. (Jan. 2020). “A large-scale standardized physiological survey reveals  
753 functional organization of the mouse visual cortex”. en. *Nat. Neurosci.* 23.1, pp. 138–151.
- 754 Domenech, Philippe, Sylvain Rheims, and Etienne Koechlin (Aug. 2020). “Neural mechanisms re-  
755 solving exploitation-exploration dilemmas in the medial prefrontal cortex”. *Science* 369.6507,  
756 eabb0184.
- 757 Férézou, Isabelle et al. (Sept. 2002). “5-HT3 receptors mediate serotonergic fast synaptic excita-  
758 tion of neocortical vasoactive intestinal peptide/cholecystokinin interneurons”. *J. Neurosci.*  
759 22.17, pp. 7389–7397.
- 760 Fu, Yu et al. (Mar. 2014). “A cortical circuit for gain control by behavioral state”. *Cell* 156.6,  
761 pp. 1139–1152.
- 762 Garrett, Marina et al. (2023). “Stimulus novelty uncovers coding diversity in visual cortical  
763 circuits”. *bioRxiv*. DOI: 10.1101/2023.02.14.528085.
- 764 Gilad, Ariel et al. (Aug. 2018). “Behavioral strategy determines frontal or posterior location of  
765 short-term memory in neocortex”. *Neuron* 99.4, 814–828.e7.
- 766 Gomez-Marin, Alex et al. (Nov. 2014). “Big behavioral data: psychology, ethology and the foun-  
767 dations of neuroscience”. *Nature Neuroscience* 17.11, pp. 1455–1462. ISSN: 1546-1726. DOI:  
768 10.1038/nn.3812.
- 769 Groblewski, Peter A et al. (June 2020). “Characterization of learning, motivation, and visual  
770 perception in five transgenic mouse lines expressing GCaMP in distinct cell populations”.  
771 en. *Front. Behav. Neurosci.* 14, p. 104.
- 772 Jha, Aditi, Zoe C. Ashwood, and Jonathan W. Pillow (2022). *Bayesian Active Learning for*  
773 *Discrete Latent Variable Models*. DOI: 10.48550/ARXIV.2202.13426.
- 774 Juavinett, Ashley L, Jeffrey C Erlich, and Anne K Churchland (Apr. 2018). “Decision-making  
775 behaviors: weighing ethology, complexity, and sensorimotor compatibility”. *Curr. Opin. Neu-*  
776 *robiol.* 49, pp. 42–50.
- 777 Kamigaki, Tsukasa (Apr. 2019). “Dissecting executive control circuits with neuron types”. *Neu-*  
778 *rosci. Res.* 141, pp. 13–22.
- 779 Karnani, Mahesh M et al. (Apr. 2016). “Cooperative subnetworks of molecularly similar in-  
780 terneurons in mouse neocortex”. *Neuron* 90.1, pp. 86–100.
- 781 Keller, Andreas J et al. (Dec. 2020). “A disinhibitory circuit for contextual modulation in primary  
782 visual cortex”. *Neuron* 108.6, 1181–1193.e8.
- 783 Kim, Jinho et al. (Dec. 2020). “Behavioral and neural bases of tactile shape discrimination  
784 learning in head-fixed mice”. *Neuron* 108.5, 953–967.e8.
- 785 Krakauer, John W et al. (Feb. 2017). “Neuroscience needs behavior: Correcting a reductionist  
786 bias”. *Neuron* 93.3, pp. 480–490.
- 787 Kullander, Klas and Lisa Topolnik (Aug. 2021). “Cortical disinhibitory circuits: cell types, con-  
788 nectivity and function”. *Trends Neurosci.* 44.8, pp. 643–657.
- 789 Le, Nhat Minh et al. (2022). “Mixture of Learning Strategies Underlies Rodent Behavior in  
790 Dynamic Foraging”. *bioRxiv*. DOI: 10.1101/2022.03.14.484338.
- 791 Leinweber, Marcus et al. (Sept. 2017). “A sensorimotor circuit in mouse cortex for visual flow  
792 predictions”. *Neuron* 95.6, 1420–1432.e5.
- 793 Ma, Guofen et al. (May 2021). “Hierarchy in sensory processing reflected by innervation balance  
794 on cortical interneurons”. *Sci. Adv.* 7.20, eabf5676.



- 795 Martersteck, Emily M et al. (Feb. 2017). “Diverse central projection patterns of retinal ganglion  
796 cells”. en. *Cell Rep.* 18.8, pp. 2058–2072.
- 797 Meister, Markus (2022). “Learning, fast and slow”. *Current Opinion in Neurobiology* 75, p. 102555.  
798 ISSN: 0959-4388. DOI: <https://doi.org/10.1016/j.conb.2022.102555>.
- 799 Millman, Daniel J et al. (Oct. 2020). “VIP interneurons in mouse primary visual cortex selectively  
800 enhance responses to weak but specific stimuli”. *Elife* 9.
- 801 Musall, Simon et al. (Oct. 2019). “Harnessing behavioral diversity to understand neural compu-  
802 tations for cognition”. *Curr. Opin. Neurobiol.* 58, pp. 229–238.
- 803 Myers-Joseph, Dylan et al. (2023). “Attentional modulation is orthogonal to disinhibition by  
804 VIP interneurons in primary visual cortex”. *bioRxiv*. DOI: 10.1101/2022.11.28.518253.
- 805 Niv, Yael (Oct. 2021). “The primacy of behavioral research for understanding the brain”. *Behav.*  
806 *Neurosci.* 135.5, pp. 601–609.
- 807 Pfeffer, Carsten K et al. (Aug. 2013). “Inhibition of inhibition in visual cortex: the logic of  
808 connections between molecularly distinct interneurons”. *Nat. Neurosci.* 16.8, pp. 1068–1076.
- 809 Pho, Gerald N et al. (July 2018). “Task-dependent representations of stimulus and choice in  
810 mouse parietal cortex”. en. *Nat. Commun.* 9.1, p. 2596.
- 811 Pi, Hyun-Jae et al. (Nov. 2013). “Cortical interneurons that specialize in disinhibitory control”.  
812 *Nature* 503.7477, pp. 521–524.
- 813 Pinto, Lucas and Yang Dan (July 2015). “Cell-type-specific activity in prefrontal cortex during  
814 goal-directed behavior”. *Neuron* 87.2, pp. 437–450.
- 815 Pinto, Lucas et al. (Nov. 2019). “Task-dependent changes in the large-scale dynamics and ne-  
816 cessity of cortical regions”. *Neuron* 104.4, 810–824.e9.
- 817 Prönneke, Alvar et al. (Mar. 2020). “Neuromodulation leads to a burst-tonic switch in a subset of  
818 VIP neurons in mouse primary somatosensory (barrel) cortex”. *Cereb. Cortex* 30.2, pp. 488–  
819 504.
- 820 Proskurin, Mikhail, Maxim Manakov, and Alla Y. Karpova (2022). “ACC neural ensemble dy-  
821 namics are structured by strategy prevalence”. *bioRxiv*. DOI: 10.1101/2022.11.17.516909.
- 822 Rosenberg, Matthew et al. (July 2021). “Mice in a labyrinth show rapid learning, sudden insight,  
823 and efficient exploration”. en. *Elife* 10.
- 824 Roy, Nicholas A. et al. (2018). “Efficient inference for time-varying behavior during learning”. In:  
825 *Advances in Neural Information Processing Systems*. Ed. by S. Bengio et al. Vol. 31. Curran  
826 Associates, Inc.
- 827 Roy, Nicholas A. et al. (Feb. 2021). “Extracting the dynamics of behavior in sensory decision-  
828 making experiments”. *Neuron* 109.4, 597–610.e6.
- 829 Saravanan, Varun, Gordon J Berman, and Samuel J Sober (July 2020). “Application of the hi-  
830 erarchical bootstrap to multi-level data in neuroscience”. *Neuron. Behav. Data Anal. Theory*  
831 3.5.
- 832 Schneider, David M (Oct. 2020). “Reflections of action in sensory cortex”. *Curr. Opin. Neurobiol.*  
833 64, pp. 53–59.
- 834 Schuck, Nicolas W et al. (Apr. 2015). “Medial prefrontal cortex predicts internally driven strategy  
835 shifts”. *Neuron* 86.1, pp. 331–340.
- 836 Sylwestrak, Emily L et al. (Sept. 2022). “Cell-type-specific population dynamics of diverse reward  
837 computations”. *Cell* 185.19, 3568–3587.e27.
- 838 Tasic, Bosiljka et al. (Nov. 2018). “Shared and distinct transcriptomic cell types across neocor-  
839 tical areas”. *Nature* 563.7729, pp. 72–78.
- 840 Tervo, D Gowanlock R et al. (June 2021). “The anterior cingulate cortex directs exploration of  
841 alternative strategies”. *Neuron* 109.11, 1876–1887.e6.
- 842 Tseng, Shih-Yi et al. (Aug. 2022). “Shared and specialized coding across posterior cortical areas  
843 for dynamic navigation decisions”. *Neuron* 110.15, 2484–2502.e16.

- 844 Venkatraman, Vinod et al. (May 2009). “Separate neural mechanisms underlie choices and strate-  
845 gic preferences in risky decision making”. *Neuron* 62.4, pp. 593–602.
- 846 Waiblinger, Christian et al. (Jan. 2022). “Emerging experience-dependent dynamics in primary  
847 somatosensory cortex reflect behavioral adaptation”. *Nat. Commun.* 13.1, p. 534.
- 848 Williams, Leena E and Anthony Holtmaat (Jan. 2019). “Higher-order thalamocortical inputs  
849 gate synaptic long-term potentiation via disinhibition”. *Neuron* 101.1, 91–102.e4.
- 850 Yang, Y., C. Sibert, and A. Stocco (2023). “Competing Decision-Making Systems Are Adaptively  
851 Chosen Based on Individual Differences in Brain Connectivity”. *bioRxiv*. DOI: 10.1101/2023.  
852 01.10.523458.

## 853 Supplemental Materials

854 The supplementary materials contains extended figures and control analyses for several as-  
855 pects of the study:

- 856 1. Mouse behavior
- 857 2. Segmenting licks into licking bouts
- 858 3. Constructing the timing strategy
- 859 4. Model validation
- 860 5. Strategy characterization
- 861 6. PCA on model strategies
- 862 7. Strategy over training
- 863 8. Strategy behavior over time
- 864 9. Microcircuit dynamics
- 865 10. Running speed and task engagement
- 866 11. Transition to the novel image set

867 Supplemental Note 1 - Mouse behavior

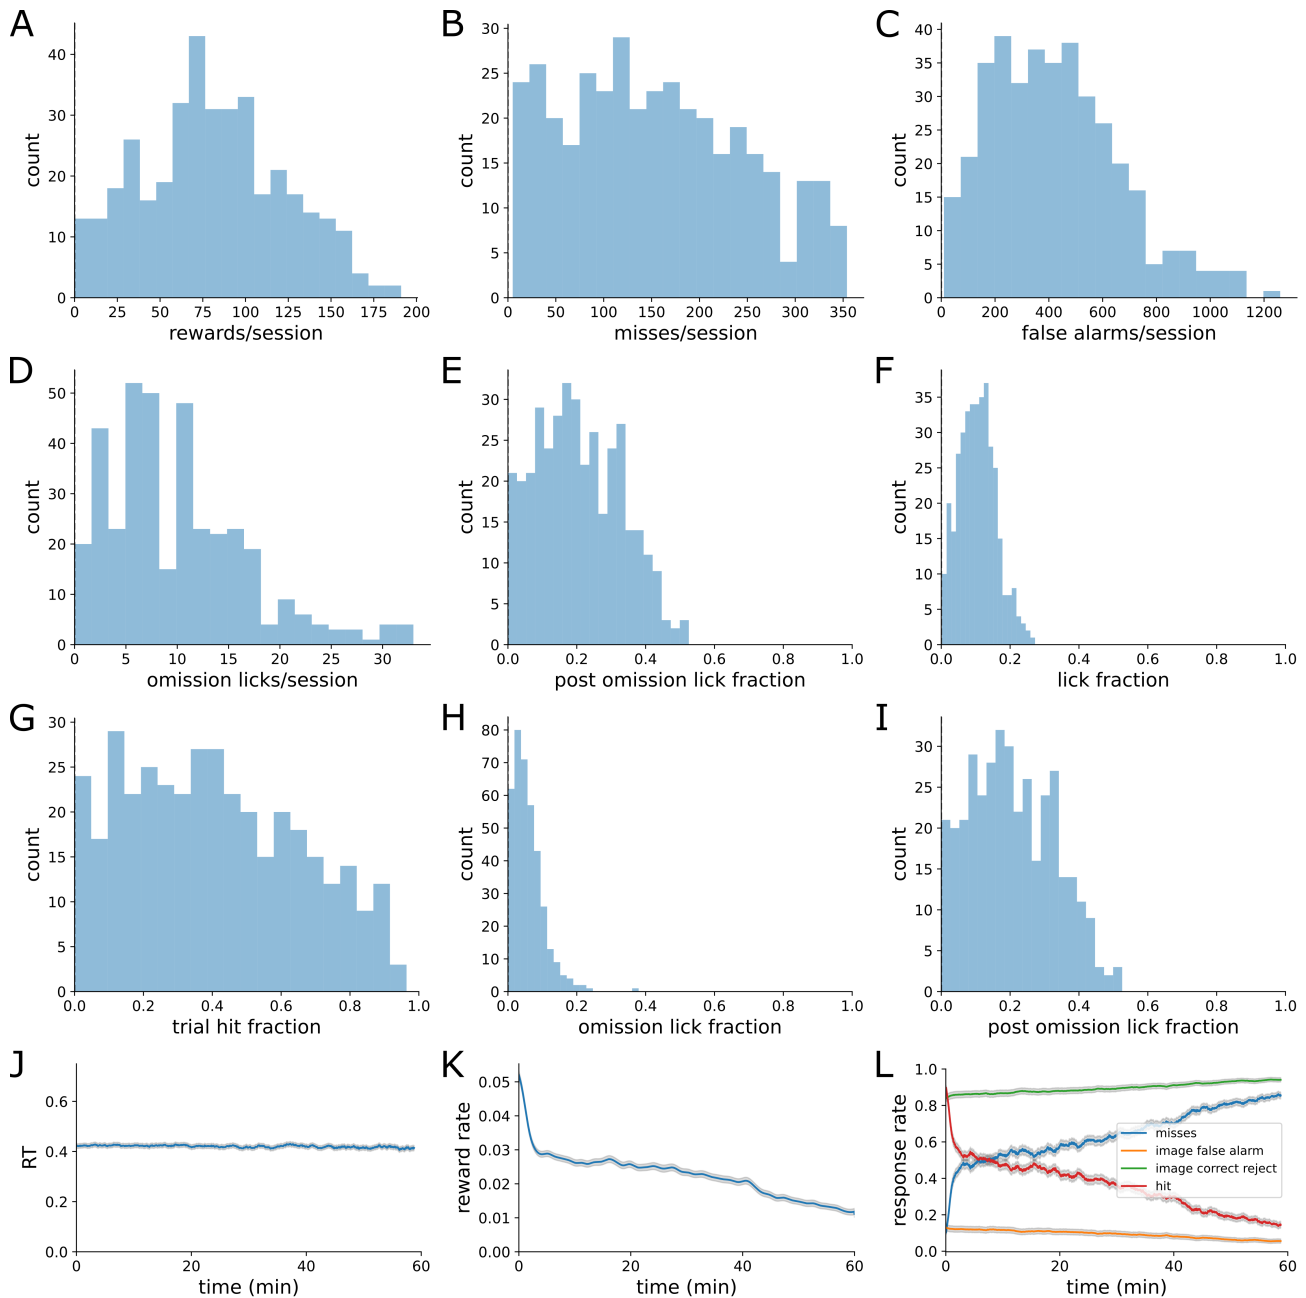

Figure 8: **Quantification of mouse behavior.** (A) Histogram of rewards/session. (B) Histogram of misses/session. (C) Histogram of false alarms / session. (D) Histogram of omissions with licks/session. (E) Histogram of post-omission-licks/session (F) Histogram of average lick fraction per session. (G) Histogram of fraction of image changes with licks per session. (H) Histogram of fraction of omissions with licks per session. (I) Histogram of fraction of post-omission images with licks per session. (J) Average Response latency over time. (K) Average reward rate over time. (L) Hit, Miss, False alarm, and correct reject rates over time.

## 868 Supplemental Note 2 - Segmenting licks into licking bouts

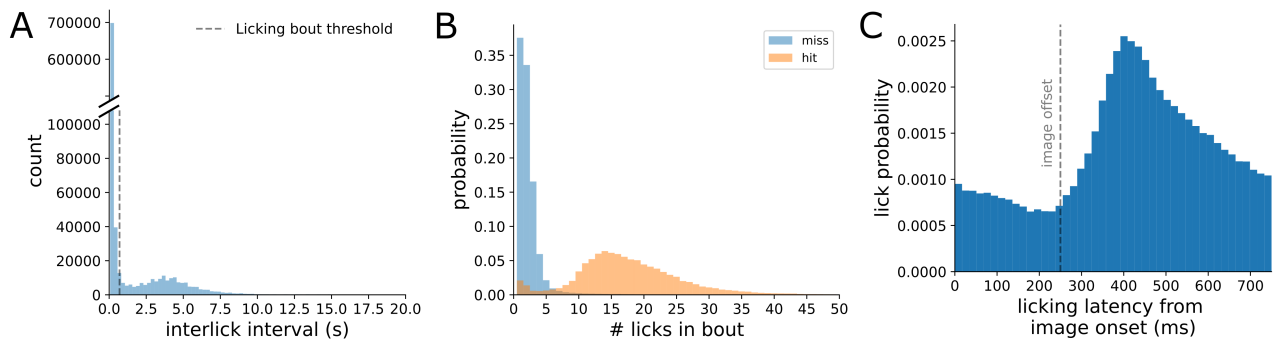

Figure 9: **Licks were segmented into licking bouts and aligned to image onset.** (A) Histogram of interval between successive licks ( $n = 936,136$  licks from 382 imaging sessions). Dashed line indicates 700ms threshold used to separate licks within the same licking bout ( $< 700$ ms) and licks in separate licking bout ( $> 700$ ms). (B) Histogram of the number of licks in each licking bout separated by whether the licking bout earned a reward (hit) or did not (miss) ( $n = 190,410$  licking bouts from 382 imaging sessions). (C) Histogram of the response latency for the start of each licking bout with respect to the most recent image onset ( $n = 190,410$  licking bouts from 382 imaging sessions).

## 869 Supplemental Note 3 - Constructing the timing strategy

870 A subset of 45 sessions were used to construct the timing regressor. The strategy model  
 871 was fit with 10 timing regressors, each using 1-hot encoding for different length delays since the  
 872 image with the end of the last licking bout. Then a four parameter sigmoid was fit to the average  
 873 weights of each of these 1-hot timing regressors. The equation of the four parameter sigmoid  
 874 used to construct the timing regressor is given by:

$$y(t) = y_{min} + \frac{y_{max} - y_{min}}{1 + (t/a)^b}. \quad (4)$$

875 Here,  $y_{min}$  and  $y_{max}$  scale the vertical limits of the sigmoid,  $a$  controls the midpoint of the  
 876 sigmoid, and  $b$  influences the slope of the sigmoid. The slope of the sigmoid at the midpoint is  
 877 given by  $-b/4a$ . The parameters used in the full model were:  $y_{min}=-1$ ,  $y_{max}=0$ ,  $a = 4$ ,  $b = -5$ .  
 878 The timing regressor for each session was mean-centered.

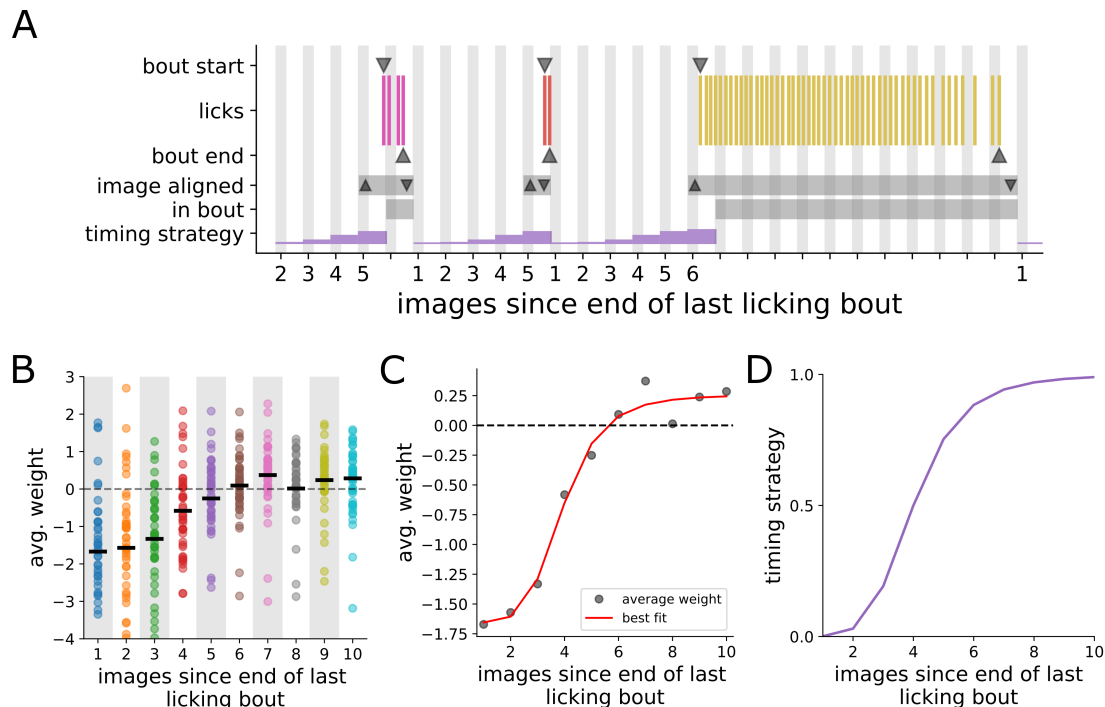

Figure 10: **Constructing the timing regressor.** (A) Schematic illustrating how timing is measured. Shaded bars indicate the time of stimulus presentations. Tick marks indicate the time of each lick. Individual licking bouts are colored separately. Down arrows ( $\nabla$ ) indicate the start of each licking bout. Up arrows ( $\Delta$ ) indicate the end of each licking bout. Our model predicts whether the mouse will start a licking bout on each image presentation. Therefore images where the mouse was already in a licking bout are excluded from the fitting process. Consequently, our timing regressor starts measuring how many images have been presented since the end of the last licking bout starting at 1. The timing strategy is a sigmoidal function of time since the end of the last licking bout. Note the timing strategy is undefined on image when the mouse was already in a licking bout. (B) Average weight of each timing regressor (dots,  $n=45$  sessions) Black bars indicate the average across sessions. (C) A four parameter sigmoid was fit to the average regressor weights from panel A (gray dots). The best fitting sigmoid is shown in red. (D) The timing strategy uses the midpoint and shape parameters from panel C, but scales the sigmoid to unit height. The strategy vector is later mean-centered.

## 879 Supplemental Note 4 - Model validation

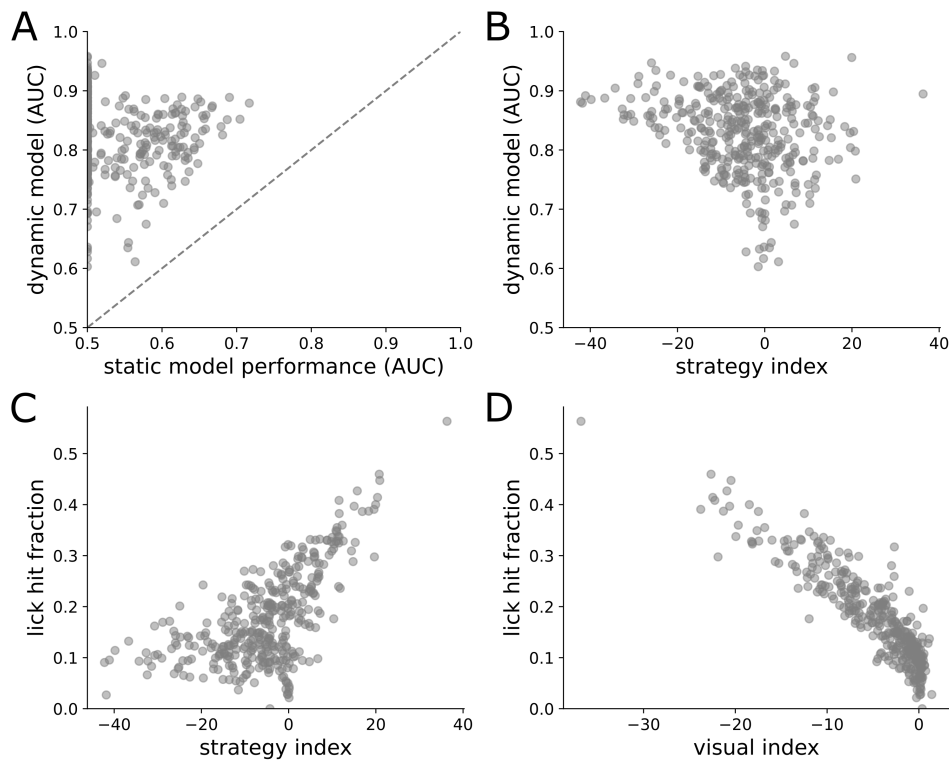

Figure 11: **Model validation.** (A) Scatter plot of area under ROC curves for each session for the dynamic model compared to static logistic regression (n=382 imaging sessions). Dashed line marks unity. (B) Scatter plot of area under ROC curves for each session for the dynamic model compared to the strategy index. (C-D) The lick hit fraction is the fraction of licking bouts that resulted in a reward. (C) Lick hit fraction compared to the strategy index. (D) Lick hit fraction compared to the visual strategy index.

## 880 Supplemental Note 5 - Strategy characterization

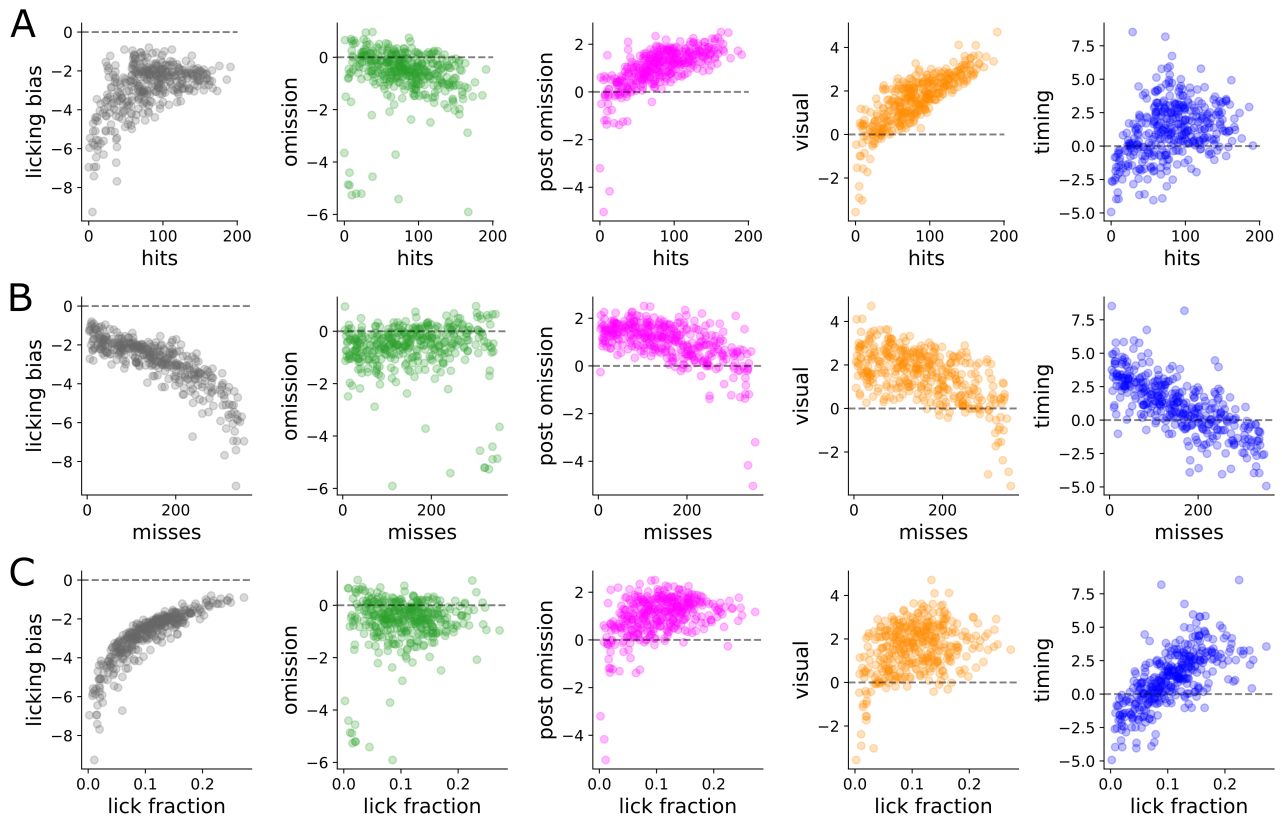

Figure 12: **Average strategy weights are correlated with task events.** Scatter plot between the average weight of each strategy and task events. Hits (A) are image changes with a reward, misses (B) are image changes without a reward, and lick fraction (C) is the fraction of images with a lick bout start.



## 881 Supplemental Note 6 - Principal Components Analysis

882 To assess the variability of strategies across our behavioral dataset we performed PCA on the  
883 matrix of strategy indices containing 382 imaging sessions. Examining the component vectors  
884 we find that the first component is primarily aligned with the timing strategy, while the second  
885 is primarily aligned with the visual strategy. We find that these top two components contain  
886 99.04% of the total variance (72.13% and 26.90%, respectively). Indeed, 98.24% of all variance  
887 is contained in just the timing and visual strategy indices. This finding motivates our use of  
888 the strategy index, which is simply the difference between the visual and timing indices. The  
889 strategy index contains 59.95% of the total variance, and has a strong correlation with the top  
890 principal component ( $R^2 = 0.88$ ).

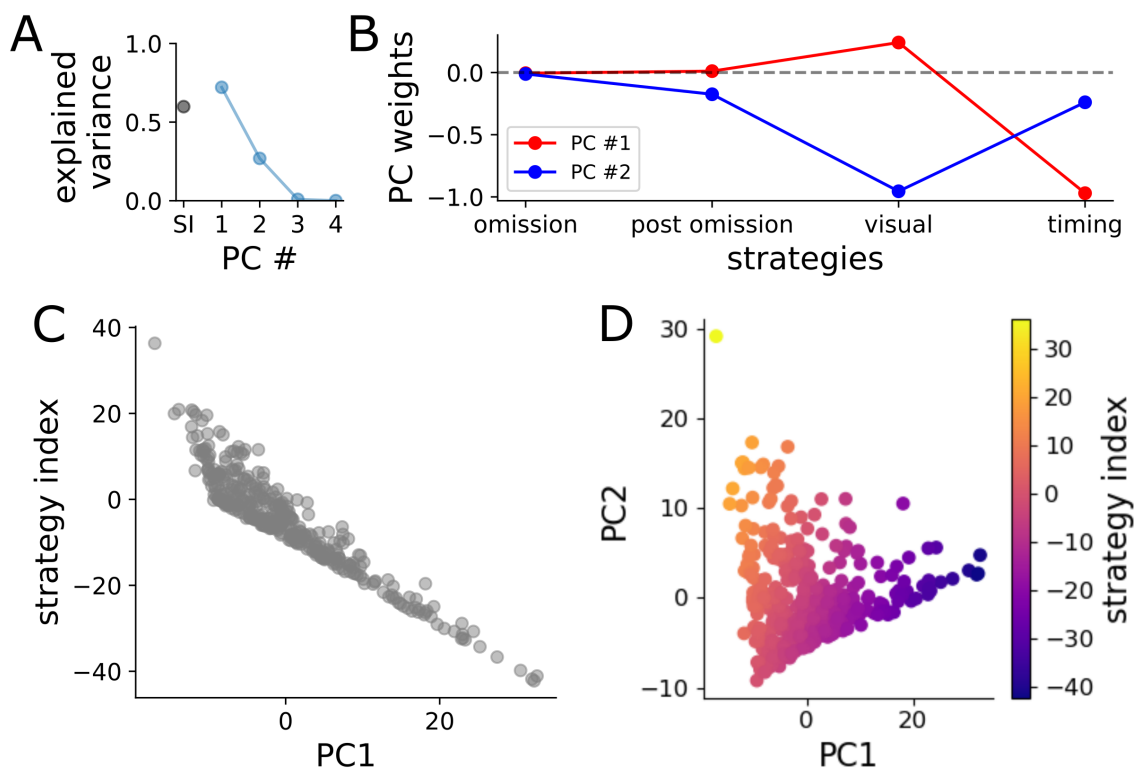

Figure 13: **Principal Components Analysis (PCA) on strategy index.** (A) Variance along each principal component (PC #), as well as the variance along the strategy index (SI). (B) The top two principal components are aligned with the timing and visual strategies, respectively. (C) Scatter plot between each session projected onto the first principal component and the strategy index. (D) All sessions (n=382 imaging sessions) projected onto the first two principal components and colored by the strategy index.

## Supplemental Note 7 - Strategy over training

To examine how strategy preferences emerge with training, we classified mice by their dominant strategy (visual or timing) based on their behavior during imaging. We then fit our strategy model to the training sessions and examined how their strategy preferences changed over training. The training pipeline consisted of 7 stages before imaging:

- Training 0 - Mice learned to lick for rewards
- Training 1 - Mice earned rewards when a static grating changed orientation
- Training 2 - Static gratings were interleaved with a gray screen
- Training 3 - Static gratings are replaced with natural images
- Training 4 - Rewards decrease in size, and free rewards are no longer given when the mouse misses 10 changes in a row
- Training 5 - Performance must be consistently above a minimum threshold
- Habitation - Mice performed the task on the imaging rig
- Imaging - Mice performed the task with familiar images, then with novel images. Imaging was also performed during passive viewing of the same stimulus, which was not analyzed here.

We did not fit the model to training stages 0 and 1 because the stimulus was continuous and not periodically presented. In general we find strategy preferences emerge slowly over the training stages. Visual dominant mice significantly increased their use of the visual strategy over training (Fig. 13B), while decreasing their use of the timing strategy (Fig. 13C). Timing dominant mice showed less change in strategy use over training. Both strategies show decreases in the number of licking bouts (Fig. 13G), increases in the fraction of licking bouts that result in a reward (Fig. 13H), increases in the number of missed image changes (Fig. 13E), decreases in the fraction of the session they are engaged (Fig. 13F), while maintaining or slightly increasing the rewards per session (Fig. 13D). As mice increase their lick hit fraction, they need to lick less often to earn the same number of rewards. By increasing their lick hit fraction, this means they are licking on image changes more often rather than licking early which delays the next image change. Increasing their lick hit fraction means they can earn more rewards in less time, and thus they disengage earlier and miss more image changes while they are disengaged.

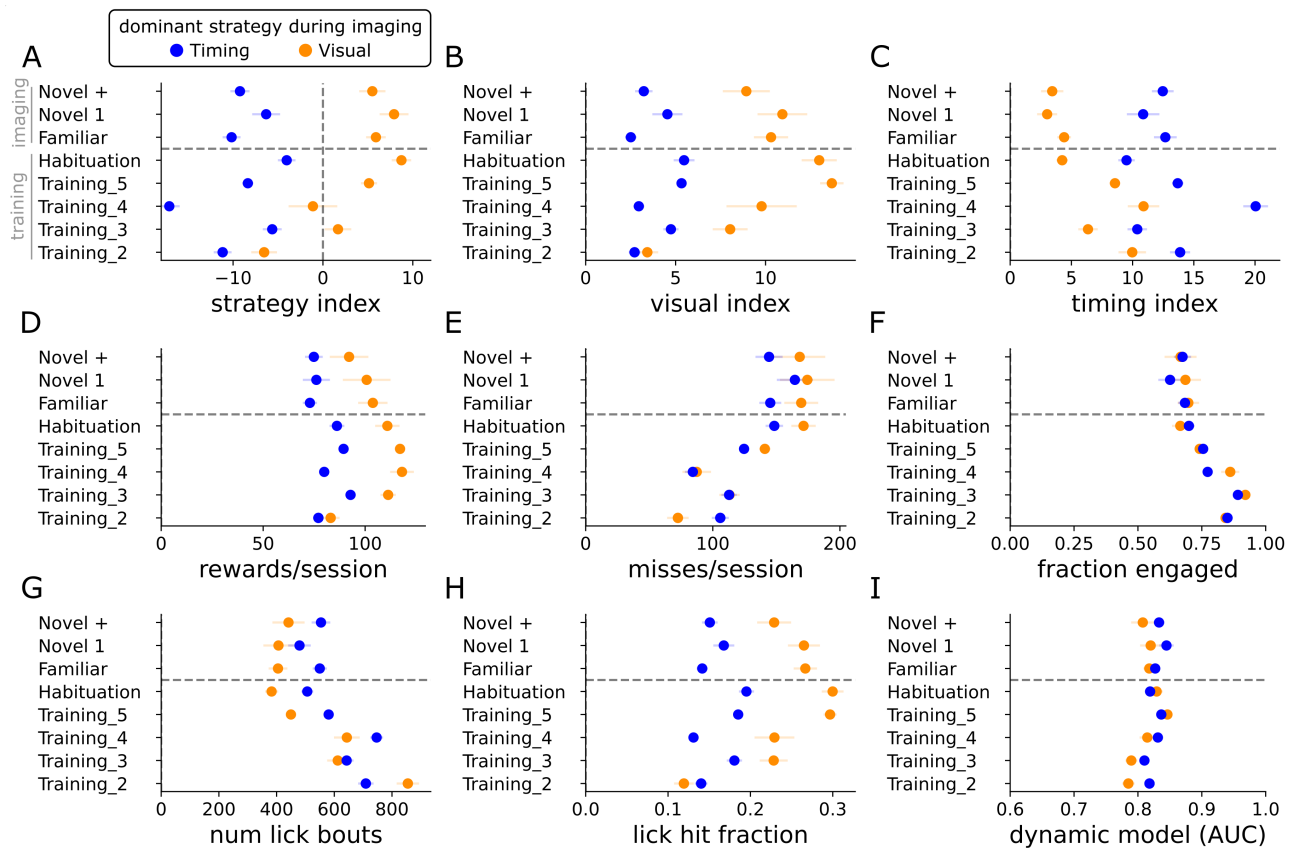

Figure 14: **Strategy over training** Metrics as described in Supplemental Note 1. Each dot shows mean  $\pm$  SEM for each strategy group.

920 **Supplemental Note 8 - Strategy behavior over time**

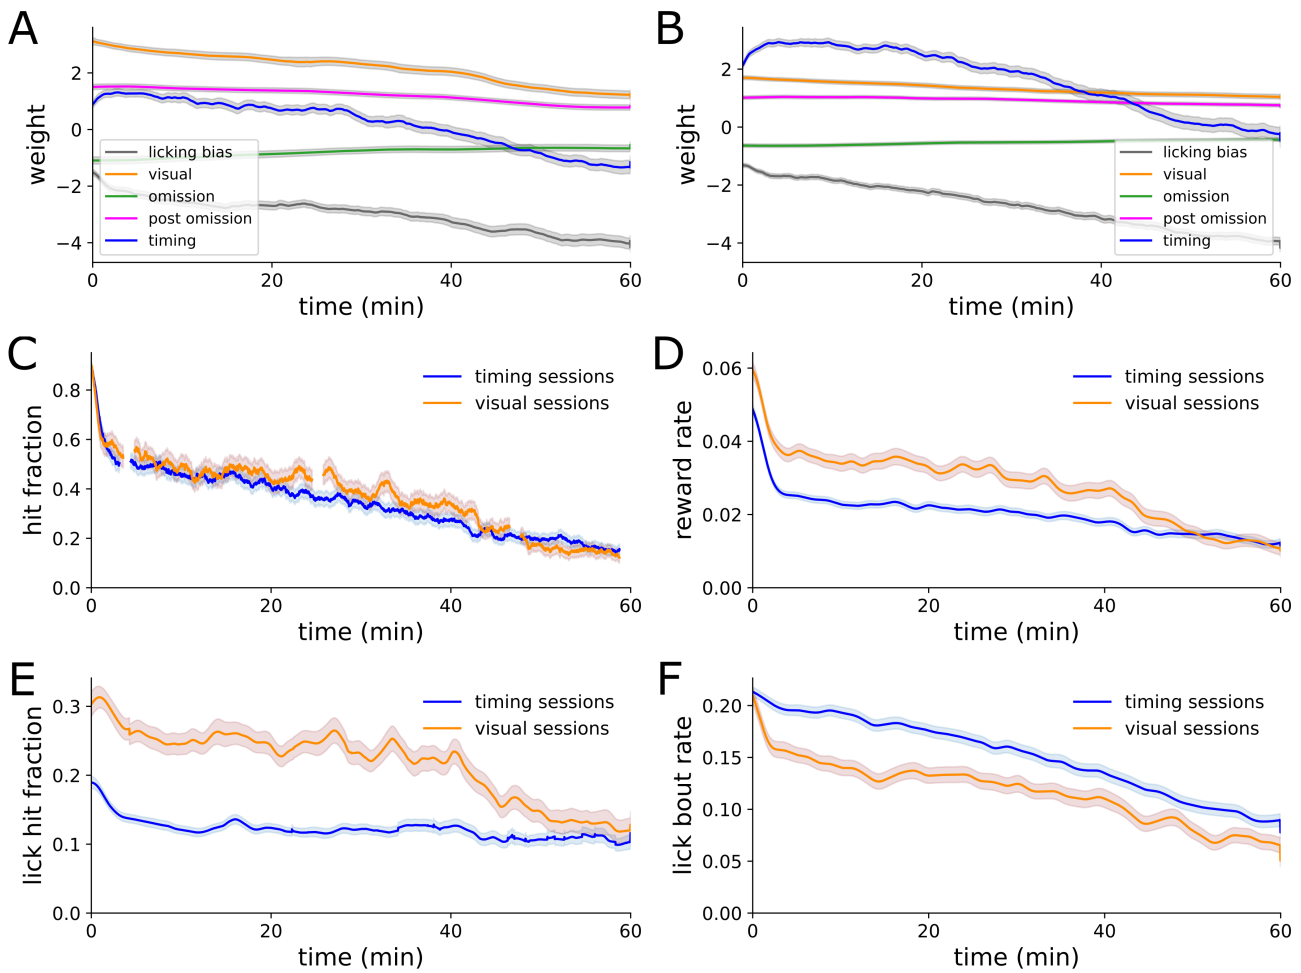

Figure 15: **Strategy behavior over time.** (A) Average strategy weights over time for visual strategy sessions (n = 116 sessions). (B) Same as A but restricted to timing strategy sessions (n=260 sessions). (C) Hit fraction split by visual or timing strategy sessions. (D) Reward rate split by visual or timing strategy sessions. (E) Lick hit fraction split by visual or timing strategy sessions. (F) Lick bout rate split by visual or timing strategy sessions.

## 921 Supplemental Note 9 - Microcircuit dynamics

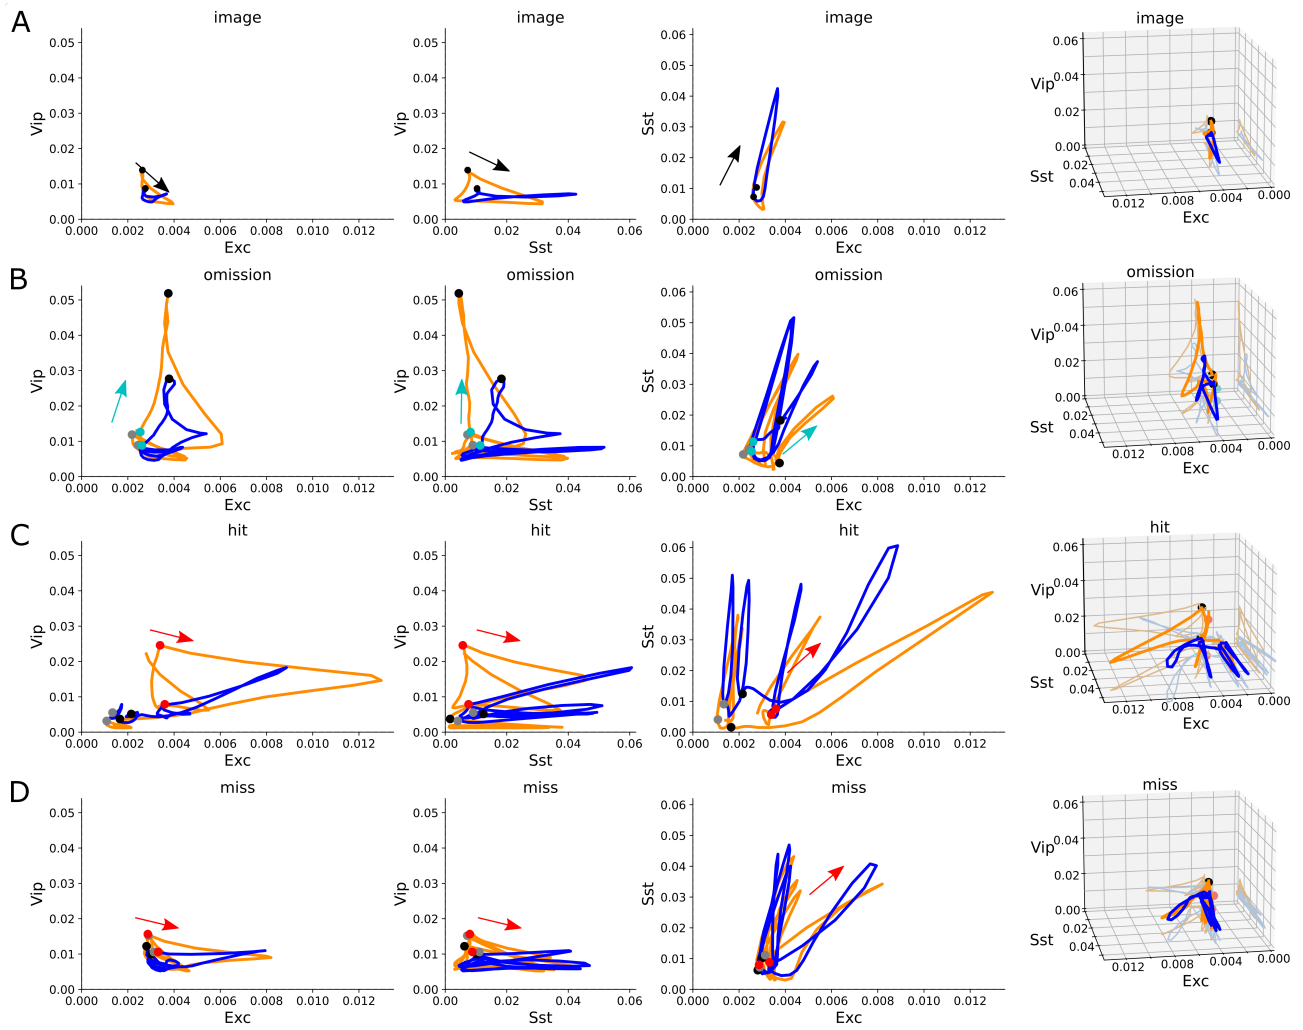

Figure 16: **Microcircuit dynamics** Average population activity of different cell classes plotted against each other, similar to figure 5D. In response to (A) image repeats, (B) image omissions, (C) hits, and (D) misses. NOTE - need to polish, remove Vip-Sst vs Exc column, add 3D plots.

922 **Supplemental Note 10 - Running speed and task engagement**  
923

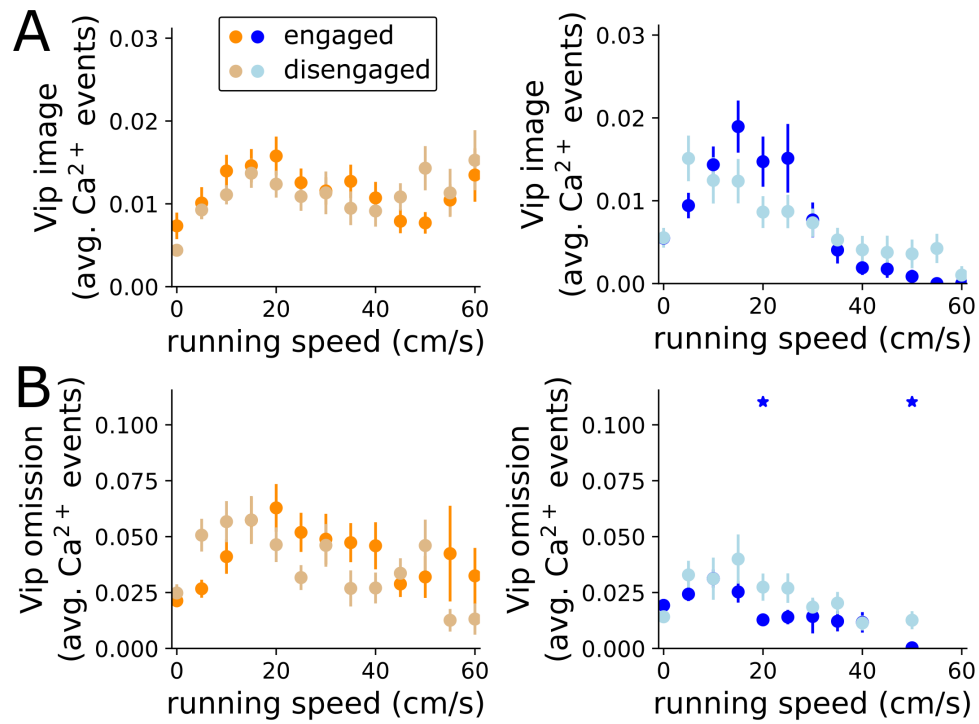

Figure 17: **Running speed and task engagement.** Similar to 4F,G. Vip activity in response to images and omissions across running speeds split by dominant strategy and task engagement. Stars indicates  $p < 0.05$  after a hierarchical bootstrap across imaging planes and cells, then corrected for multiple comparisons.

## 924 Supplemental Note 11 - Transition to the novel image set

925 The mice were trained on one set of 8 images, we refer to this as as the familiar image set.  
926 After imaging during the familiar image set, the mice were transitioned to a new set of 8 images  
927 termed here as novel image set. We compare how this transition influenced mouse strategy.  
928 The familiar session is the last session using the familiar image set. Novel is the first exposure  
929 to the new image set. Novel+ is a repeated exposure to the new image set. The transition to  
930 novel stimuli is explored in-depth in Garrett et al. 2023. We make two notes here relevant to  
931 task strategy. First, there is a small but significant shift in the strategy index on novel sessions  
932 towards more visual strategy. Second, both strategies show the neural effects of novelty explored  
933 in Garrett et al. 2023. Thus any differences in strategy cannot explain the effects of novelty.  
934 Broadly, during the novel session we see increased Vip activation in response to image repeats,  
935 omissions, and before hits.

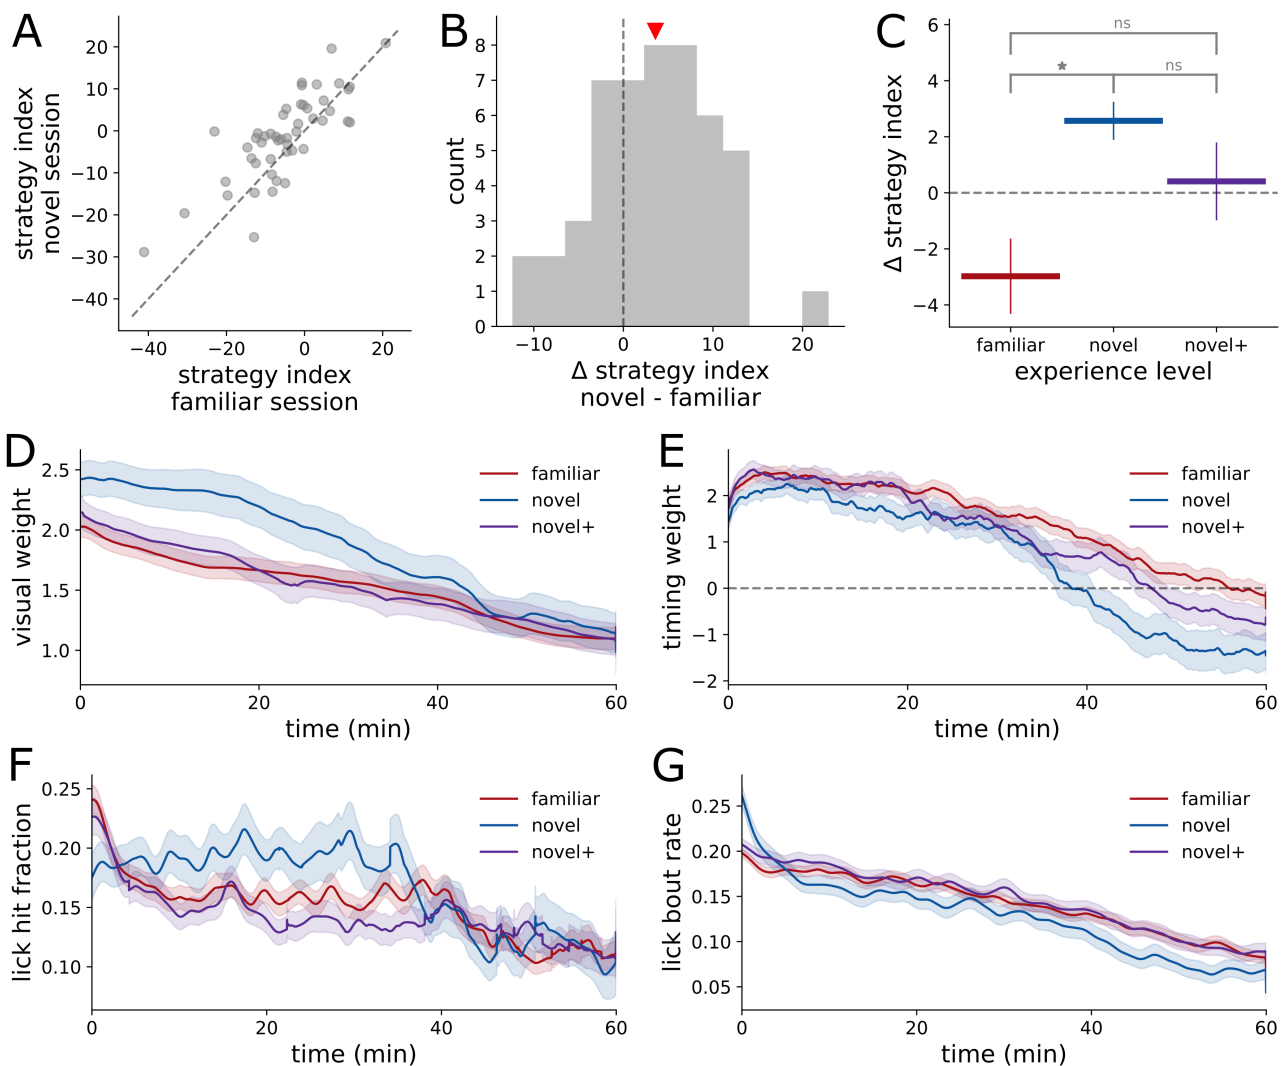

Figure 18: **Stimulus novelty has a small influence on strategy.** (A) Scatter plot of the strategy index for familiar and novel sessions. Each dot is a pair of sessions from the same mouse. (B) Histogram of the difference between strategy index on the novel session compared to the familiar session. (C) Average value of the strategy index across all mice relative to each mouse's average strategy index value. Significance determined with a paired t-test,  $p < 0.05$ . (D) Visual strategy weight over time split by experience level. (E) Same as D but for the timing strategy weight. (F) Lick hit fraction over time split by experience level. (G) Lick bout rate split by experience level.

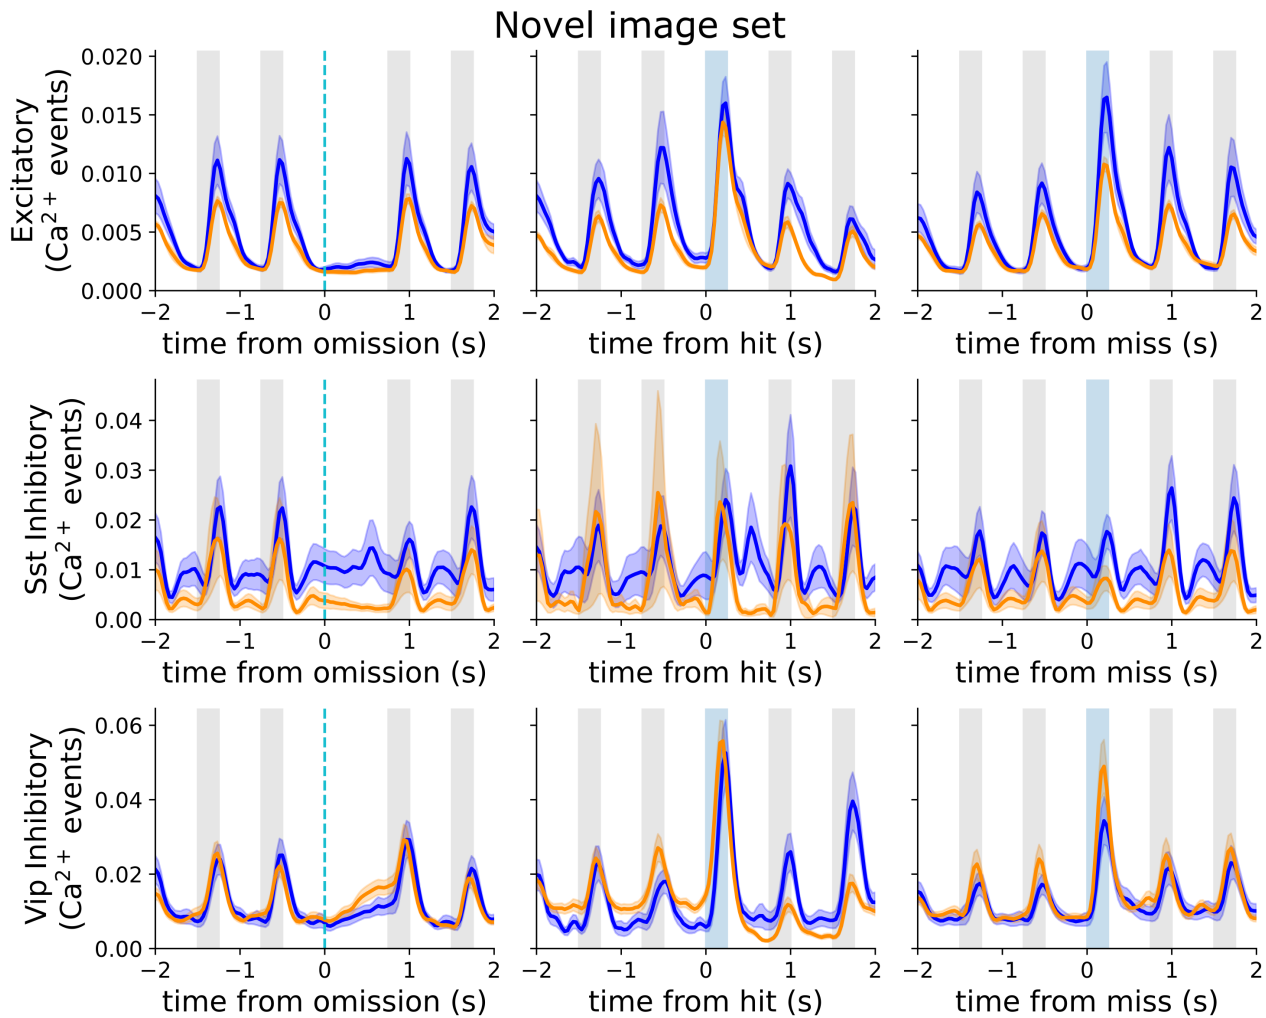

Figure 19: **Both dominant strategies show robust changes to novel stimuli** Average population activity on sessions with novel stimuli for each cell class split by strategy aligned to either image omissions (left), hits (center), or misses (right). Compare with figure 4D, which show population activity on sessions with familiar stimuli.
